# Supplementary material
Source: publisher site journal article supplement (https://www.dovepress.com/article/505332)
Supplement: Supplementary file 1 [file 01_Apr_2025_Supplementary_materials_6.docx]

**Supplementary Table 1.** STROBE-MR checklist

STROBE-MR checklist of recommended items to address in reports of Mendelian randomization studies1 2

| **Item No.** | **Section** | **Checklist item** | **Note/ Page No.** |
| --- | --- | --- | --- |
| 1 | **TITLE and ABSTRACT** | Indicate Mendelian randomization (MR) as the study’s design in the title and/or the abstract if that is a main purpose of the study | ‘Mendelian randomization’ in title and abstract |
|  | **INTRODUCTION** |  |  |
| 2 | **Background** | Explain the scientific background and rationale for the reported study. What is the exposure? Is a potential causal relationship between exposure and outcome plausible? Justify why MR is a helpful method to address the study question | Page 3-5 |
| 3 | **Objectives** | State specific objectives clearly, including pre-specified causal hypotheses (if any). State that MR is a method that, under specific assumptions, intends to estimate causal effects | Page 5 |
|  | **METHODS** |  |  |
| 4 | **Study design and data sources** | Present key elements of the study design early in the article. Consider including a table listing sources of data for all phases of the study. For each data source contributing to the analysis, describe the following: | Page 5-6,figure 1 |
|  | a) | Setting: Describe the study design and the underlying population, if possible. Describe the setting, locations, and relevant dates, including periods of recruitment, exposure, follow-up, and data collection, when available. |
|  | b) | Participants: Give the eligibility criteria, and the sources and methods of selection of participants. Report the sample size, and whether any power or sample size calculations were carried out prior to the main analysis |
|  | c) | Describe measurement, quality control and selection of genetic variants |
|  | d) | For each exposure, outcome, and other relevant variables, describe methods of assessment and diagnostic criteria for diseases |
|  | e) | Provide details of ethics committee approval and participant informed consent, if relevant |
| 5 | **Assumptions** | Explicitly state the three core IV assumptions for the main analysis (relevance, independence and exclusion restriction) as well assumptions for any additional or sensitivity analysis | Page 5 |
| 6 | **Statistical methods: main analysis** | Describe statistical methods and statistics used | Page 6-7 |
|  | a) | Describe how quantitative variables were handled in the analyses (i.e., scale, units, model) |
|  | b) | Describe how genetic variants were handled in the analyses and, if applicable, how their weights were selected |
|  | c) | Describe the MR estimator (e.g. two-stage least squares, Wald ratio) and related statistics. Detail the included covariates and, in case of two-sample MR, whether the same covariate set was used for adjustment in the two samples |
|  | d) | Explain how missing data were addressed |
|  | e) | If applicable, indicate how multiple testing was addressed |
| 7 | **Assessment of assumptions** | Describe any methods or prior knowledge used to assess the assumptions or justify their validity | Page 6-7 |
| 8 | **Sensitivity analyses and additional analyses** | Describe any sensitivity analyses or additional analyses performed (e.g. comparison of effect estimates from different approaches, independent replication, bias analytic techniques, validation of instruments, simulations) | Page 6-7 |
| 9 | **Software and pre-registration** |  |  |
|  | a) | Name statistical software and package(s), including version and settings used | Page 7 |
|  | b) | State whether the study protocol and details were pre-registered (as well as when and where) |
|  | **RESULTS** |  |  |
| 10 | **Descriptive data** |  |  |
|  | a) | Report the numbers of individuals at each stage of included studies and reasons for exclusion. Consider use of a flow diagram |  |
|  | b) | Report summary statistics for phenotypic exposure(s), outcome(s), and other relevant variables (e.g. means, SDs, proportions) | Page 7-8，figure 2 |
|  | c) | If the data sources include meta-analyses of previous studies, provide the assessments of heterogeneity across these studies |
|  | d) | For two-sample MR:  i.  Provide justification of the similarity of the genetic variant-exposure associations between the exposure and outcome samples  ii.  Provide information on the number of individuals who overlap between the exposure and outcome studies |
| 11 | **Main results** |  |  |
|  | a) | Report the associations between genetic variant and exposure, and between genetic variant and outcome, preferably on an interpretable scale | Page 7-8 |
|  | b) | Report MR estimates of the relationship between exposure and outcome, and the measures of uncertainty from the MR analysis, on an interpretable scale, such as odds ratio or relative risk per SD difference |
|  | c) | If relevant, consider translating estimates of relative risk into absolute risk for a meaningful time period |
|  | d) | Consider plots to visualize results (e.g. forest plot, scatterplot of associations between genetic variants and outcome versus between genetic variants and exposure) |
| 12 | **Assessment of assumptions** |  | Page 7-8 |
|  | a) | Report the assessment of the validity of the assumptions |
|  | b) | Report any additional statistics (e.g., assessments of heterogeneity across genetic variants, such as *I2*, Q statistic or E-value) |
| 13 | **Sensitivity analyses and additional analyses** |  | Page 7-8,table1 |
|  | a) | Report any sensitivity analyses to assess the robustness of the main results to violations of the assumptions |
|  | b) | Report results from other sensitivity analyses or additional analyses |
|  | c) | Report any assessment of direction of causal relationship (e.g., bidirectional MR) |
|  | d) | When relevant, report and compare with estimates from non-MR analyses |
|  | e) | Consider additional plots to visualize results (e.g., leave-one-out analyses) |
|  | **DISCUSSION** |  |  |
| 14 | **Key results** | Summarize key results with reference to study objectives | Page 8-11 |
| 15 | **Limitations** | Discuss limitations of the study, taking into account the validity of the IV assumptions, other sources of potential bias, and imprecision. Discuss both direction and magnitude of any potential bias and any efforts to address them | Page 8-11 |
| 16 | **Interpretation** |  |  |
|  | a) | Meaning: Give a cautious overall interpretation of results in the context of their limitations and in comparison with other studies | Page 8-11 |
|  | b) | Mechanism: Discuss underlying biological mechanisms that could drive a potential causal relationship between the investigated exposure and the outcome, and whether the gene-environment equivalence assumption is reasonable. Use causal language carefully, clarifying that IV estimates may provide causal effects only under certain assumptions |
|  | c) | Clinical relevance: Discuss whether the results have clinical or public policy relevance, and to what extent they inform effect sizes of possible interventions |
| 17 | **Generalizability** | Discuss the generalizability of the study results (a) to other populations, (b) across other exposure periods/timings, and (c) across other levels of exposure | Page 8-11 |
|  | **OTHER INFORMATION** |  |  |
| 18 | **Funding** | Describe sources of funding and the role of funders in the present study and, if applicable, sources of funding for the databases and original study or studies on which the present study is based | Page 12 |
| 19 | **Data and data sharing** | Provide the data used to perform all analyses or report where and how the data can be accessed, and reference these sources in the article. Provide the statistical code needed to reproduce the results in the article, or report whether the code is publicly accessible and if so, where | Page 12 |
| 20 | **Conflicts of Interest** | All authors should declare all potential conflicts of interest | Page 12 |

This checklist is copyrighted by the Equator Network under the Creative Commons Attribution 3.0 Unported (CC BY 3.0) license.

1. Skrivankova VW, Richmond RC, Woolf BAR, Yarmolinsky J, Davies NM, Swanson SA, et al. Strengthening the Reporting of Observational Studies in Epidemiology using Mendelian Randomization (STROBE-MR) Statement. JAMA. 2021;under review.

2. Skrivankova VW, Richmond RC, Woolf BAR, Davies NM, Swanson SA, VanderWeele TJ, et al. Strengthening the Reporting of Observational Studies in Epidemiology using Mendelian Randomisation (STROBE-MR): Explanation and Elaboration. BMJ. 2021;375:n2233.

**Supplementary Table 2：**MR results of the relationship between dietary taste preferences and POI

| id.exposure | id.outcome | outcome | exposure | method | nsnp | b | se | pval |
| --- | --- | --- | --- | --- | --- | --- | --- | --- |
| ebi-fl187-GCST90094687 | finngen_R11_E4_OVARFAIL | Primary ovarian failure | Adding salt to food liking | Inverse variance weighted | 13 | 0.008 | 0.300 | 0.979 |
| ebi-fl187-GCST90094687 | finngen_R11_E4_OVARFAIL | Primary ovarian failure | Adding salt to food liking | MR Egger | 13 | -2.423 | 1.022 | 0.037 |
| ebi-fl187-GCST90094687 | finngen_R11_E4_OVARFAIL | Primary ovarian failure | Adding salt to food liking | Simple mode | 13 | 0.084 | 0.583 | 0.888 |
| ebi-fl187-GCST90094687 | finngen_R11_E4_OVARFAIL | Primary ovarian failure | Adding salt to food liking | Weighted mode | 13 | 0.014 | 0.529 | 0.980 |
| ebi-fl187-GCST90094687 | finngen_R11_E4_OVARFAIL | Primary ovarian failure | Adding salt to food liking | Weighted median | 13 | -0.029 | 0.379 | 0.939 |
| ebi-fl187-GCST90094689 | finngen_R11_E4_OVARFAIL | Primary ovarian failure | Aniseed liking | Inverse variance weighted | 9 | -0.382 | 0.446 | 0.392 |
| ebi-fl187-GCST90094689 | finngen_R11_E4_OVARFAIL | Primary ovarian failure | Aniseed liking | MR Egger | 9 | 0.116 | 1.812 | 0.951 |
| ebi-fl187-GCST90094689 | finngen_R11_E4_OVARFAIL | Primary ovarian failure | Aniseed liking | Simple mode | 9 | -0.466 | 0.843 | 0.596 |
| ebi-fl187-GCST90094689 | finngen_R11_E4_OVARFAIL | Primary ovarian failure | Aniseed liking | Weighted mode | 9 | -0.521 | 0.793 | 0.529 |
| ebi-fl187-GCST90094689 | finngen_R11_E4_OVARFAIL | Primary ovarian failure | Aniseed liking | Weighted median | 9 | -0.328 | 0.518 | 0.528 |
| ebi-fl187-GCST90094690 | finngen_R11_E4_OVARFAIL | Primary ovarian failure | Apple juice liking | Wald ratio | 1 | -0.139 | 1.200 | 0.908 |
| ebi-fl187-GCST90094691 | finngen_R11_E4_OVARFAIL | Primary ovarian failure | Apples liking | Inverse variance weighted | 3 | 0.588 | 1.108 | 0.595 |
| ebi-fl187-GCST90094691 | finngen_R11_E4_OVARFAIL | Primary ovarian failure | Apples liking | MR Egger | 3 | 5.339 | 3.622 | 0.379 |
| ebi-fl187-GCST90094691 | finngen_R11_E4_OVARFAIL | Primary ovarian failure | Apples liking | Simple mode | 3 | -0.419 | 1.613 | 0.819 |
| ebi-fl187-GCST90094691 | finngen_R11_E4_OVARFAIL | Primary ovarian failure | Apples liking | Weighted mode | 3 | -0.419 | 1.683 | 0.826 |
| ebi-fl187-GCST90094692 | finngen_R11_E4_OVARFAIL | Primary ovarian failure | Asparagus liking | Inverse variance weighted | 8 | 0.822 | 0.421 | 0.051 |
| ebi-fl187-GCST90094692 | finngen_R11_E4_OVARFAIL | Primary ovarian failure | Asparagus liking | MR Egger | 8 | 4.316 | 2.142 | 0.091 |
| ebi-fl187-GCST90094692 | finngen_R11_E4_OVARFAIL | Primary ovarian failure | Asparagus liking | Simple mode | 8 | 1.439 | 0.908 | 0.157 |
| ebi-fl187-GCST90094692 | finngen_R11_E4_OVARFAIL | Primary ovarian failure | Asparagus liking | Weighted mode | 8 | 1.465 | 0.819 | 0.117 |
| ebi-fl187-GCST90094692 | finngen_R11_E4_OVARFAIL | Primary ovarian failure | Asparagus liking | Weighted median | 8 | 1.124 | 0.531 | 0.034 |
| ebi-fl187-GCST90094693 | finngen_R11_E4_OVARFAIL | Primary ovarian failure | Aubergine liking | Inverse variance weighted | 10 | 0.305 | 0.334 | 0.362 |
| ebi-fl187-GCST90094693 | finngen_R11_E4_OVARFAIL | Primary ovarian failure | Aubergine liking | MR Egger | 10 | 1.802 | 1.819 | 0.351 |
| ebi-fl187-GCST90094693 | finngen_R11_E4_OVARFAIL | Primary ovarian failure | Aubergine liking | Simple mode | 10 | -0.009 | 0.709 | 0.990 |
| ebi-fl187-GCST90094693 | finngen_R11_E4_OVARFAIL | Primary ovarian failure | Aubergine liking | Weighted mode | 10 | 0.366 | 0.676 | 0.602 |
| ebi-fl187-GCST90094693 | finngen_R11_E4_OVARFAIL | Primary ovarian failure | Aubergine liking | Weighted median | 10 | 0.225 | 0.443 | 0.611 |
| ebi-fl187-GCST90094694 | finngen_R11_E4_OVARFAIL | Primary ovarian failure | Avocado liking | Inverse variance weighted | 11 | 0.094 | 0.346 | 0.786 |
| ebi-fl187-GCST90094694 | finngen_R11_E4_OVARFAIL | Primary ovarian failure | Avocado liking | MR Egger | 11 | 1.939 | 2.985 | 0.532 |
| ebi-fl187-GCST90094694 | finngen_R11_E4_OVARFAIL | Primary ovarian failure | Avocado liking | Simple mode | 11 | 0.723 | 0.767 | 0.368 |
| ebi-fl187-GCST90094694 | finngen_R11_E4_OVARFAIL | Primary ovarian failure | Avocado liking | Weighted mode | 11 | 0.792 | 0.798 | 0.344 |
| ebi-fl187-GCST90094694 | finngen_R11_E4_OVARFAIL | Primary ovarian failure | Avocado liking | Weighted median | 11 | 0.417 | 0.457 | 0.362 |
| ebi-fl187-GCST90094695 | finngen_R11_E4_OVARFAIL | Primary ovarian failure | Bacon liking | Inverse variance weighted | 4 | -0.684 | 0.528 | 0.195 |
| ebi-fl187-GCST90094695 | finngen_R11_E4_OVARFAIL | Primary ovarian failure | Bacon liking | MR Egger | 4 | 0.228 | 1.820 | 0.912 |
| ebi-fl187-GCST90094695 | finngen_R11_E4_OVARFAIL | Primary ovarian failure | Bacon liking | Simple mode | 4 | -1.358 | 0.884 | 0.222 |
| ebi-fl187-GCST90094695 | finngen_R11_E4_OVARFAIL | Primary ovarian failure | Bacon liking | Weighted mode | 4 | -0.227 | 0.773 | 0.788 |
| ebi-fl187-GCST90094695 | finngen_R11_E4_OVARFAIL | Primary ovarian failure | Bacon liking | Weighted median | 4 | -0.612 | 0.657 | 0.352 |
| ebi-fl187-GCST90094696 | finngen_R11_E4_OVARFAIL | Primary ovarian failure | Baked/steamed fish liking | Inverse variance weighted | 7 | 0.392 | 0.484 | 0.418 |
| ebi-fl187-GCST90094696 | finngen_R11_E4_OVARFAIL | Primary ovarian failure | Baked/steamed fish liking | MR Egger | 7 | 3.959 | 5.031 | 0.467 |
| ebi-fl187-GCST90094696 | finngen_R11_E4_OVARFAIL | Primary ovarian failure | Baked/steamed fish liking | Simple mode | 7 | 0.205 | 0.860 | 0.820 |
| ebi-fl187-GCST90094696 | finngen_R11_E4_OVARFAIL | Primary ovarian failure | Baked/steamed fish liking | Weighted mode | 7 | 0.073 | 0.834 | 0.933 |
| ebi-fl187-GCST90094696 | finngen_R11_E4_OVARFAIL | Primary ovarian failure | Baked/steamed fish liking | Weighted median | 7 | 0.132 | 0.611 | 0.829 |
| ebi-fl187-GCST90094697 | finngen_R11_E4_OVARFAIL | Primary ovarian failure | Banana liking | Inverse variance weighted | 2 | 0.958 | 1.278 | 0.453 |
| ebi-fl187-GCST90094698 | finngen_R11_E4_OVARFAIL | Primary ovarian failure | BBQ/grilled meat liking | Inverse variance weighted | 3 | -0.048 | 0.523 | 0.928 |
| ebi-fl187-GCST90094698 | finngen_R11_E4_OVARFAIL | Primary ovarian failure | BBQ/grilled meat liking | MR Egger | 3 | -0.786 | 1.692 | 0.723 |
| ebi-fl187-GCST90094698 | finngen_R11_E4_OVARFAIL | Primary ovarian failure | BBQ/grilled meat liking | Simple mode | 3 | -0.200 | 0.766 | 0.818 |
| ebi-fl187-GCST90094698 | finngen_R11_E4_OVARFAIL | Primary ovarian failure | BBQ/grilled meat liking | Weighted mode | 3 | -0.206 | 0.646 | 0.780 |
| ebi-fl187-GCST90094698 | finngen_R11_E4_OVARFAIL | Primary ovarian failure | BBQ/grilled meat liking | Weighted median | 3 | -0.198 | 0.577 | 0.732 |
| ebi-fl187-GCST90094700 | finngen_R11_E4_OVARFAIL | Primary ovarian failure | Beef/steak liking | Inverse variance weighted | 5 | -0.246 | 0.456 | 0.590 |
| ebi-fl187-GCST90094700 | finngen_R11_E4_OVARFAIL | Primary ovarian failure | Beef/steak liking | MR Egger | 5 | -0.321 | 1.718 | 0.864 |
| ebi-fl187-GCST90094700 | finngen_R11_E4_OVARFAIL | Primary ovarian failure | Beef/steak liking | Simple mode | 5 | -0.255 | 0.765 | 0.756 |
| ebi-fl187-GCST90094700 | finngen_R11_E4_OVARFAIL | Primary ovarian failure | Beef/steak liking | Weighted mode | 5 | -0.241 | 0.722 | 0.755 |
| ebi-fl187-GCST90094700 | finngen_R11_E4_OVARFAIL | Primary ovarian failure | Beef/steak liking | Weighted median | 5 | -0.249 | 0.548 | 0.650 |
| ebi-fl187-GCST90094702 | finngen_R11_E4_OVARFAIL | Primary ovarian failure | Beetroot liking | Inverse variance weighted (multiplicative random effects) | 6 | -0.649 | 0.912 | 0.477 |
| ebi-fl187-GCST90094702 | finngen_R11_E4_OVARFAIL | Primary ovarian failure | Beetroot liking | MR Egger | 6 | -4.584 | 3.823 | 0.297 |
| ebi-fl187-GCST90094702 | finngen_R11_E4_OVARFAIL | Primary ovarian failure | Beetroot liking | Simple mode | 6 | 0.959 | 1.669 | 0.591 |
| ebi-fl187-GCST90094702 | finngen_R11_E4_OVARFAIL | Primary ovarian failure | Beetroot liking | Weighted mode | 6 | -1.626 | 1.556 | 0.344 |
| ebi-fl187-GCST90094702 | finngen_R11_E4_OVARFAIL | Primary ovarian failure | Beetroot liking | Weighted median | 6 | -0.809 | 0.748 | 0.280 |
| ebi-fl187-GCST90094703 | finngen_R11_E4_OVARFAIL | Primary ovarian failure | Bell pepper liking | Wald ratio | 1 | -0.472 | 1.183 | 0.690 |
| ebi-fl187-GCST90094704 | finngen_R11_E4_OVARFAIL | Primary ovarian failure | Biscuits liking | Inverse variance weighted | 9 | 0.605 | 0.466 | 0.195 |
| ebi-fl187-GCST90094704 | finngen_R11_E4_OVARFAIL | Primary ovarian failure | Biscuits liking | MR Egger | 9 | 0.644 | 2.181 | 0.776 |
| ebi-fl187-GCST90094704 | finngen_R11_E4_OVARFAIL | Primary ovarian failure | Biscuits liking | Simple mode | 9 | 0.466 | 0.898 | 0.618 |
| ebi-fl187-GCST90094704 | finngen_R11_E4_OVARFAIL | Primary ovarian failure | Biscuits liking | Weighted mode | 9 | 0.604 | 0.768 | 0.454 |
| ebi-fl187-GCST90094704 | finngen_R11_E4_OVARFAIL | Primary ovarian failure | Biscuits liking | Weighted median | 9 | 0.490 | 0.594 | 0.409 |
| ebi-fl187-GCST90094705 | finngen_R11_E4_OVARFAIL | Primary ovarian failure | Bitter ale liking | Inverse variance weighted | 4 | -0.314 | 0.799 | 0.695 |
| ebi-fl187-GCST90094705 | finngen_R11_E4_OVARFAIL | Primary ovarian failure | Bitter ale liking | MR Egger | 4 | 2.937 | 1.422 | 0.175 |
| ebi-fl187-GCST90094705 | finngen_R11_E4_OVARFAIL | Primary ovarian failure | Bitter ale liking | Simple mode | 4 | -0.962 | 1.159 | 0.468 |
| ebi-fl187-GCST90094705 | finngen_R11_E4_OVARFAIL | Primary ovarian failure | Bitter ale liking | Weighted mode | 4 | -1.120 | 0.789 | 0.251 |
| ebi-fl187-GCST90094705 | finngen_R11_E4_OVARFAIL | Primary ovarian failure | Bitter ale liking | Weighted median | 4 | -0.780 | 0.705 | 0.268 |
| ebi-fl187-GCST90094706 | finngen_R11_E4_OVARFAIL | Primary ovarian failure | F-bitter food liking | Inverse variance weighted | 6 | -1.101 | 0.558 | 0.048 |
| ebi-fl187-GCST90094706 | finngen_R11_E4_OVARFAIL | Primary ovarian failure | F-bitter food liking | MR Egger | 6 | -13.171 | 7.599 | 0.158 |
| ebi-fl187-GCST90094706 | finngen_R11_E4_OVARFAIL | Primary ovarian failure | F-bitter food liking | Simple mode | 6 | -1.781 | 1.021 | 0.142 |
| ebi-fl187-GCST90094706 | finngen_R11_E4_OVARFAIL | Primary ovarian failure | F-bitter food liking | Weighted mode | 6 | -1.791 | 0.873 | 0.096 |
| ebi-fl187-GCST90094706 | finngen_R11_E4_OVARFAIL | Primary ovarian failure | F-bitter food liking | Weighted median | 6 | -1.692 | 0.694 | 0.015 |
| ebi-fl187-GCST90094707 | finngen_R11_E4_OVARFAIL | Primary ovarian failure | Black olive liking | Inverse variance weighted | 22 | -0.098 | 0.202 | 0.628 |
| ebi-fl187-GCST90094707 | finngen_R11_E4_OVARFAIL | Primary ovarian failure | Black olive liking | MR Egger | 22 | -0.289 | 0.968 | 0.769 |
| ebi-fl187-GCST90094707 | finngen_R11_E4_OVARFAIL | Primary ovarian failure | Black olive liking | Simple mode | 22 | -0.211 | 0.536 | 0.698 |
| ebi-fl187-GCST90094707 | finngen_R11_E4_OVARFAIL | Primary ovarian failure | Black olive liking | Weighted mode | 22 | -0.266 | 0.507 | 0.606 |
| ebi-fl187-GCST90094707 | finngen_R11_E4_OVARFAIL | Primary ovarian failure | Black olive liking | Weighted median | 22 | -0.219 | 0.264 | 0.408 |
| ebi-fl187-GCST90094708 | finngen_R11_E4_OVARFAIL | Primary ovarian failure | Black pepper liking | Inverse variance weighted | 8 | -0.423 | 0.528 | 0.423 |
| ebi-fl187-GCST90094708 | finngen_R11_E4_OVARFAIL | Primary ovarian failure | Black pepper liking | MR Egger | 8 | 3.568 | 3.126 | 0.297 |
| ebi-fl187-GCST90094708 | finngen_R11_E4_OVARFAIL | Primary ovarian failure | Black pepper liking | Simple mode | 8 | 0.654 | 1.246 | 0.616 |
| ebi-fl187-GCST90094708 | finngen_R11_E4_OVARFAIL | Primary ovarian failure | Black pepper liking | Weighted mode | 8 | 0.723 | 0.941 | 0.468 |
| ebi-fl187-GCST90094708 | finngen_R11_E4_OVARFAIL | Primary ovarian failure | Black pepper liking | Weighted median | 8 | 0.454 | 0.652 | 0.487 |
| ebi-fl187-GCST90094709 | finngen_R11_E4_OVARFAIL | Primary ovarian failure | Blue cheese liking | Inverse variance weighted | 16 | 0.124 | 0.212 | 0.558 |
| ebi-fl187-GCST90094709 | finngen_R11_E4_OVARFAIL | Primary ovarian failure | Blue cheese liking | MR Egger | 16 | -0.916 | 1.101 | 0.420 |
| ebi-fl187-GCST90094709 | finngen_R11_E4_OVARFAIL | Primary ovarian failure | Blue cheese liking | Simple mode | 16 | -0.319 | 0.557 | 0.575 |
| ebi-fl187-GCST90094709 | finngen_R11_E4_OVARFAIL | Primary ovarian failure | Blue cheese liking | Weighted mode | 16 | -0.300 | 0.570 | 0.606 |
| ebi-fl187-GCST90094709 | finngen_R11_E4_OVARFAIL | Primary ovarian failure | Blue cheese liking | Weighted median | 16 | 0.029 | 0.297 | 0.922 |
| ebi-fl187-GCST90094711 | finngen_R11_E4_OVARFAIL | Primary ovarian failure | Broad bean liking | Inverse variance weighted | 11 | -0.265 | 0.378 | 0.483 |
| ebi-fl187-GCST90094711 | finngen_R11_E4_OVARFAIL | Primary ovarian failure | Broad bean liking | MR Egger | 11 | 1.726 | 0.892 | 0.085 |
| ebi-fl187-GCST90094711 | finngen_R11_E4_OVARFAIL | Primary ovarian failure | Broad bean liking | Simple mode | 11 | -0.858 | 0.719 | 0.260 |
| ebi-fl187-GCST90094711 | finngen_R11_E4_OVARFAIL | Primary ovarian failure | Broad bean liking | Weighted mode | 11 | -0.376 | 0.542 | 0.503 |
| ebi-fl187-GCST90094711 | finngen_R11_E4_OVARFAIL | Primary ovarian failure | Broad bean liking | Weighted median | 11 | -0.246 | 0.455 | 0.588 |
| ebi-fl187-GCST90094712 | finngen_R11_E4_OVARFAIL | Primary ovarian failure | Broccoli liking | Inverse variance weighted | 4 | 1.144 | 0.725 | 0.114 |
| ebi-fl187-GCST90094712 | finngen_R11_E4_OVARFAIL | Primary ovarian failure | Broccoli liking | MR Egger | 4 | 4.635 | 8.839 | 0.652 |
| ebi-fl187-GCST90094712 | finngen_R11_E4_OVARFAIL | Primary ovarian failure | Broccoli liking | Simple mode | 4 | 0.556 | 1.113 | 0.652 |
| ebi-fl187-GCST90094712 | finngen_R11_E4_OVARFAIL | Primary ovarian failure | Broccoli liking | Weighted mode | 4 | 1.223 | 1.091 | 0.344 |
| ebi-fl187-GCST90094712 | finngen_R11_E4_OVARFAIL | Primary ovarian failure | Broccoli liking | Weighted median | 4 | 1.098 | 0.860 | 0.202 |
| ebi-fl187-GCST90094714 | finngen_R11_E4_OVARFAIL | Primary ovarian failure | Brussel sprout liking | Inverse variance weighted (multiplicative random effects) | 5 | 0.483 | 0.929 | 0.603 |
| ebi-fl187-GCST90094714 | finngen_R11_E4_OVARFAIL | Primary ovarian failure | Brussel sprout liking | MR Egger | 5 | 1.346 | 4.142 | 0.767 |
| ebi-fl187-GCST90094714 | finngen_R11_E4_OVARFAIL | Primary ovarian failure | Brussel sprout liking | Simple mode | 5 | 0.968 | 0.935 | 0.359 |
| ebi-fl187-GCST90094714 | finngen_R11_E4_OVARFAIL | Primary ovarian failure | Brussel sprout liking | Weighted mode | 5 | 0.876 | 0.731 | 0.297 |
| ebi-fl187-GCST90094714 | finngen_R11_E4_OVARFAIL | Primary ovarian failure | Brussel sprout liking | Weighted median | 5 | 0.678 | 0.625 | 0.278 |
| ebi-fl187-GCST90094716 | finngen_R11_E4_OVARFAIL | Primary ovarian failure | F-burn/spicy liking | Inverse variance weighted | 13 | -0.257 | 0.301 | 0.393 |
| ebi-fl187-GCST90094716 | finngen_R11_E4_OVARFAIL | Primary ovarian failure | F-burn/spicy liking | MR Egger | 13 | -1.130 | 1.825 | 0.548 |
| ebi-fl187-GCST90094716 | finngen_R11_E4_OVARFAIL | Primary ovarian failure | F-burn/spicy liking | Simple mode | 13 | -1.019 | 0.839 | 0.248 |
| ebi-fl187-GCST90094716 | finngen_R11_E4_OVARFAIL | Primary ovarian failure | F-burn/spicy liking | Weighted mode | 13 | -1.019 | 0.809 | 0.232 |
| ebi-fl187-GCST90094716 | finngen_R11_E4_OVARFAIL | Primary ovarian failure | F-burn/spicy liking | Weighted median | 13 | -0.573 | 0.392 | 0.144 |
| ebi-fl187-GCST90094717 | finngen_R11_E4_OVARFAIL | Primary ovarian failure | Adding butter to bread liking | Inverse variance weighted | 3 | -0.114 | 0.515 | 0.825 |
| ebi-fl187-GCST90094717 | finngen_R11_E4_OVARFAIL | Primary ovarian failure | Adding butter to bread liking | MR Egger | 3 | -0.313 | 1.108 | 0.825 |
| ebi-fl187-GCST90094717 | finngen_R11_E4_OVARFAIL | Primary ovarian failure | Adding butter to bread liking | Simple mode | 3 | -0.025 | 0.759 | 0.977 |
| ebi-fl187-GCST90094717 | finngen_R11_E4_OVARFAIL | Primary ovarian failure | Adding butter to bread liking | Weighted mode | 3 | -0.169 | 0.569 | 0.794 |
| ebi-fl187-GCST90094717 | finngen_R11_E4_OVARFAIL | Primary ovarian failure | Adding butter to bread liking | Weighted median | 3 | -0.130 | 0.537 | 0.809 |
| ebi-fl187-GCST90094718 | finngen_R11_E4_OVARFAIL | Primary ovarian failure | Butternut squash liking | Inverse variance weighted | 3 | 0.192 | 0.595 | 0.747 |
| ebi-fl187-GCST90094718 | finngen_R11_E4_OVARFAIL | Primary ovarian failure | Butternut squash liking | MR Egger | 3 | 4.966 | 3.888 | 0.423 |
| ebi-fl187-GCST90094718 | finngen_R11_E4_OVARFAIL | Primary ovarian failure | Butternut squash liking | Simple mode | 3 | 0.124 | 0.973 | 0.911 |
| ebi-fl187-GCST90094718 | finngen_R11_E4_OVARFAIL | Primary ovarian failure | Butternut squash liking | Weighted mode | 3 | 0.455 | 0.902 | 0.664 |
| ebi-fl187-GCST90094718 | finngen_R11_E4_OVARFAIL | Primary ovarian failure | Butternut squash liking | Weighted median | 3 | 0.263 | 0.700 | 0.708 |
| ebi-fl187-GCST90094719 | finngen_R11_E4_OVARFAIL | Primary ovarian failure | Cabbage liking | Inverse variance weighted (multiplicative random effects) | 5 | -0.171 | 1.239 | 0.890 |
| ebi-fl187-GCST90094719 | finngen_R11_E4_OVARFAIL | Primary ovarian failure | Cabbage liking | MR Egger | 5 | 14.210 | 5.719 | 0.089 |
| ebi-fl187-GCST90094719 | finngen_R11_E4_OVARFAIL | Primary ovarian failure | Cabbage liking | Simple mode | 5 | -0.053 | 1.203 | 0.967 |
| ebi-fl187-GCST90094719 | finngen_R11_E4_OVARFAIL | Primary ovarian failure | Cabbage liking | Weighted mode | 5 | -0.013 | 0.938 | 0.990 |
| ebi-fl187-GCST90094719 | finngen_R11_E4_OVARFAIL | Primary ovarian failure | Cabbage liking | Weighted median | 5 | 0.136 | 0.889 | 0.879 |
| ebi-fl187-GCST90094721 | finngen_R11_E4_OVARFAIL | Primary ovarian failure | Cake liking | Inverse variance weighted | 13 | 0.776 | 0.377 | 0.040 |
| ebi-fl187-GCST90094721 | finngen_R11_E4_OVARFAIL | Primary ovarian failure | Cake liking | MR Egger | 13 | 0.531 | 1.627 | 0.750 |
| ebi-fl187-GCST90094721 | finngen_R11_E4_OVARFAIL | Primary ovarian failure | Cake liking | Simple mode | 13 | 0.977 | 0.853 | 0.274 |
| ebi-fl187-GCST90094721 | finngen_R11_E4_OVARFAIL | Primary ovarian failure | Cake liking | Weighted mode | 13 | 0.721 | 0.650 | 0.289 |
| ebi-fl187-GCST90094721 | finngen_R11_E4_OVARFAIL | Primary ovarian failure | Cake liking | Weighted median | 13 | 0.583 | 0.497 | 0.241 |
| ebi-fl187-GCST90094723 | finngen_R11_E4_OVARFAIL | Primary ovarian failure | Cake icing liking | Inverse variance weighted | 8 | 0.031 | 0.434 | 0.942 |
| ebi-fl187-GCST90094723 | finngen_R11_E4_OVARFAIL | Primary ovarian failure | Cake icing liking | MR Egger | 8 | -0.733 | 3.161 | 0.824 |
| ebi-fl187-GCST90094723 | finngen_R11_E4_OVARFAIL | Primary ovarian failure | Cake icing liking | Simple mode | 8 | 0.992 | 1.057 | 0.379 |
| ebi-fl187-GCST90094723 | finngen_R11_E4_OVARFAIL | Primary ovarian failure | Cake icing liking | Weighted mode | 8 | 0.949 | 1.007 | 0.377 |
| ebi-fl187-GCST90094723 | finngen_R11_E4_OVARFAIL | Primary ovarian failure | Cake icing liking | Weighted median | 8 | 0.293 | 0.577 | 0.612 |
| ebi-fl187-GCST90094724 | finngen_R11_E4_OVARFAIL | Primary ovarian failure | Capers liking | Inverse variance weighted | 12 | -0.122 | 0.289 | 0.673 |
| ebi-fl187-GCST90094724 | finngen_R11_E4_OVARFAIL | Primary ovarian failure | Capers liking | MR Egger | 12 | -1.548 | 1.363 | 0.283 |
| ebi-fl187-GCST90094724 | finngen_R11_E4_OVARFAIL | Primary ovarian failure | Capers liking | Simple mode | 12 | -0.197 | 0.719 | 0.789 |
| ebi-fl187-GCST90094724 | finngen_R11_E4_OVARFAIL | Primary ovarian failure | Capers liking | Weighted mode | 12 | -0.575 | 0.593 | 0.353 |
| ebi-fl187-GCST90094724 | finngen_R11_E4_OVARFAIL | Primary ovarian failure | Capers liking | Weighted median | 12 | -0.261 | 0.387 | 0.500 |
| ebi-fl187-GCST90094727 | finngen_R11_E4_OVARFAIL | Primary ovarian failure | Cauliflower liking | Inverse variance weighted (multiplicative random effects) | 4 | 0.652 | 1.477 | 0.659 |
| ebi-fl187-GCST90094727 | finngen_R11_E4_OVARFAIL | Primary ovarian failure | Cauliflower liking | MR Egger | 4 | 4.601 | 7.096 | 0.583 |
| ebi-fl187-GCST90094727 | finngen_R11_E4_OVARFAIL | Primary ovarian failure | Cauliflower liking | Simple mode | 4 | -0.912 | 1.301 | 0.534 |
| ebi-fl187-GCST90094727 | finngen_R11_E4_OVARFAIL | Primary ovarian failure | Cauliflower liking | Weighted mode | 4 | -0.710 | 1.177 | 0.589 |
| ebi-fl187-GCST90094727 | finngen_R11_E4_OVARFAIL | Primary ovarian failure | Cauliflower liking | Weighted median | 4 | -0.344 | 1.078 | 0.749 |
| ebi-fl187-GCST90094728 | finngen_R11_E4_OVARFAIL | Primary ovarian failure | Cereal bar liking | Wald ratio | 1 | -1.245 | 1.277 | 0.330 |
| ebi-fl187-GCST90094730 | finngen_R11_E4_OVARFAIL | Primary ovarian failure | Cheesecake liking | Inverse variance weighted | 6 | -0.997 | 0.513 | 0.052 |
| ebi-fl187-GCST90094730 | finngen_R11_E4_OVARFAIL | Primary ovarian failure | Cheesecake liking | MR Egger | 6 | -4.036 | 5.901 | 0.532 |
| ebi-fl187-GCST90094730 | finngen_R11_E4_OVARFAIL | Primary ovarian failure | Cheesecake liking | Simple mode | 6 | -1.238 | 0.952 | 0.250 |
| ebi-fl187-GCST90094730 | finngen_R11_E4_OVARFAIL | Primary ovarian failure | Cheesecake liking | Weighted mode | 6 | -1.254 | 0.875 | 0.211 |
| ebi-fl187-GCST90094730 | finngen_R11_E4_OVARFAIL | Primary ovarian failure | Cheesecake liking | Weighted median | 6 | -1.199 | 0.610 | 0.050 |
| ebi-fl187-GCST90094731 | finngen_R11_E4_OVARFAIL | Primary ovarian failure | Cherry liking | Inverse variance weighted | 6 | 0.433 | 0.514 | 0.399 |
| ebi-fl187-GCST90094731 | finngen_R11_E4_OVARFAIL | Primary ovarian failure | Cherry liking | MR Egger | 6 | -0.792 | 1.905 | 0.699 |
| ebi-fl187-GCST90094731 | finngen_R11_E4_OVARFAIL | Primary ovarian failure | Cherry liking | Simple mode | 6 | 0.096 | 0.886 | 0.918 |
| ebi-fl187-GCST90094731 | finngen_R11_E4_OVARFAIL | Primary ovarian failure | Cherry liking | Weighted mode | 6 | -0.066 | 0.713 | 0.929 |
| ebi-fl187-GCST90094731 | finngen_R11_E4_OVARFAIL | Primary ovarian failure | Cherry liking | Weighted median | 6 | 0.075 | 0.632 | 0.905 |
| ebi-fl187-GCST90094732 | finngen_R11_E4_OVARFAIL | Primary ovarian failure | Chicken liking | Inverse variance weighted | 2 | 0.528 | 0.847 | 0.533 |
| ebi-fl187-GCST90094733 | finngen_R11_E4_OVARFAIL | Primary ovarian failure | Chilli pepper liking | Inverse variance weighted | 13 | -0.093 | 0.267 | 0.729 |
| ebi-fl187-GCST90094733 | finngen_R11_E4_OVARFAIL | Primary ovarian failure | Chilli pepper liking | MR Egger | 13 | 1.073 | 1.944 | 0.592 |
| ebi-fl187-GCST90094733 | finngen_R11_E4_OVARFAIL | Primary ovarian failure | Chilli pepper liking | Simple mode | 13 | -0.639 | 0.707 | 0.384 |
| ebi-fl187-GCST90094733 | finngen_R11_E4_OVARFAIL | Primary ovarian failure | Chilli pepper liking | Weighted mode | 13 | 0.620 | 0.652 | 0.361 |
| ebi-fl187-GCST90094733 | finngen_R11_E4_OVARFAIL | Primary ovarian failure | Chilli pepper liking | Weighted median | 13 | -0.084 | 0.383 | 0.825 |
| ebi-fl187-GCST90094734 | finngen_R11_E4_OVARFAIL | Primary ovarian failure | Chips liking | Inverse variance weighted | 4 | -1.050 | 0.701 | 0.134 |
| ebi-fl187-GCST90094734 | finngen_R11_E4_OVARFAIL | Primary ovarian failure | Chips liking | MR Egger | 4 | 1.860 | 2.201 | 0.487 |
| ebi-fl187-GCST90094734 | finngen_R11_E4_OVARFAIL | Primary ovarian failure | Chips liking | Simple mode | 4 | -0.366 | 0.948 | 0.725 |
| ebi-fl187-GCST90094734 | finngen_R11_E4_OVARFAIL | Primary ovarian failure | Chips liking | Weighted mode | 4 | -0.382 | 0.850 | 0.684 |
| ebi-fl187-GCST90094734 | finngen_R11_E4_OVARFAIL | Primary ovarian failure | Chips liking | Weighted median | 4 | -0.627 | 0.725 | 0.387 |
| ebi-fl187-GCST90094736 | finngen_R11_E4_OVARFAIL | Primary ovarian failure | Cod liking | Wald ratio | 1 | -1.100 | 1.531 | 0.472 |
| ebi-fl187-GCST90094738 | finngen_R11_E4_OVARFAIL | Primary ovarian failure | Coffee difference liking | Inverse variance weighted (multiplicative random effects) | 5 | -0.007 | 0.361 | 0.985 |
| ebi-fl187-GCST90094738 | finngen_R11_E4_OVARFAIL | Primary ovarian failure | Coffee difference liking | MR Egger | 5 | -0.789 | 1.568 | 0.649 |
| ebi-fl187-GCST90094738 | finngen_R11_E4_OVARFAIL | Primary ovarian failure | Coffee difference liking | Simple mode | 5 | -0.026 | 0.412 | 0.952 |
| ebi-fl187-GCST90094738 | finngen_R11_E4_OVARFAIL | Primary ovarian failure | Coffee difference liking | Weighted mode | 5 | -0.026 | 0.307 | 0.935 |
| ebi-fl187-GCST90094738 | finngen_R11_E4_OVARFAIL | Primary ovarian failure | Coffee difference liking | Weighted median | 5 | -0.024 | 0.281 | 0.932 |
| ebi-fl187-GCST90094739 | finngen_R11_E4_OVARFAIL | Primary ovarian failure | Coffee max liking | Inverse variance weighted | 6 | 0.309 | 0.390 | 0.428 |
| ebi-fl187-GCST90094739 | finngen_R11_E4_OVARFAIL | Primary ovarian failure | Coffee max liking | MR Egger | 6 | 0.523 | 1.078 | 0.653 |
| ebi-fl187-GCST90094739 | finngen_R11_E4_OVARFAIL | Primary ovarian failure | Coffee max liking | Simple mode | 6 | 0.402 | 0.638 | 0.557 |
| ebi-fl187-GCST90094739 | finngen_R11_E4_OVARFAIL | Primary ovarian failure | Coffee max liking | Weighted mode | 6 | 0.336 | 0.510 | 0.539 |
| ebi-fl187-GCST90094739 | finngen_R11_E4_OVARFAIL | Primary ovarian failure | Coffee max liking | Weighted median | 6 | 0.336 | 0.463 | 0.468 |
| ebi-fl187-GCST90094740 | finngen_R11_E4_OVARFAIL | Primary ovarian failure | Coffee with sugar liking | Inverse variance weighted | 4 | 0.387 | 0.485 | 0.425 |
| ebi-fl187-GCST90094740 | finngen_R11_E4_OVARFAIL | Primary ovarian failure | Coffee with sugar liking | MR Egger | 4 | -3.399 | 4.867 | 0.557 |
| ebi-fl187-GCST90094740 | finngen_R11_E4_OVARFAIL | Primary ovarian failure | Coffee with sugar liking | Simple mode | 4 | 0.683 | 0.789 | 0.450 |
| ebi-fl187-GCST90094740 | finngen_R11_E4_OVARFAIL | Primary ovarian failure | Coffee with sugar liking | Weighted mode | 4 | 0.481 | 0.709 | 0.547 |
| ebi-fl187-GCST90094740 | finngen_R11_E4_OVARFAIL | Primary ovarian failure | Coffee with sugar liking | Weighted median | 4 | 0.424 | 0.577 | 0.463 |
| ebi-fl187-GCST90094741 | finngen_R11_E4_OVARFAIL | Primary ovarian failure | Coffee without sugar liking | Inverse variance weighted | 6 | 0.288 | 0.350 | 0.411 |
| ebi-fl187-GCST90094741 | finngen_R11_E4_OVARFAIL | Primary ovarian failure | Coffee without sugar liking | MR Egger | 6 | -1.473 | 1.027 | 0.225 |
| ebi-fl187-GCST90094741 | finngen_R11_E4_OVARFAIL | Primary ovarian failure | Coffee without sugar liking | Simple mode | 6 | 0.400 | 0.529 | 0.484 |
| ebi-fl187-GCST90094741 | finngen_R11_E4_OVARFAIL | Primary ovarian failure | Coffee without sugar liking | Weighted mode | 6 | 0.210 | 0.471 | 0.674 |
| ebi-fl187-GCST90094741 | finngen_R11_E4_OVARFAIL | Primary ovarian failure | Coffee without sugar liking | Weighted median | 6 | 0.230 | 0.415 | 0.580 |
| ebi-fl187-GCST90094744 | finngen_R11_E4_OVARFAIL | Primary ovarian failure | Coriander liking | Inverse variance weighted | 2 | 0.534 | 0.847 | 0.529 |
| ebi-fl187-GCST90094745 | finngen_R11_E4_OVARFAIL | Primary ovarian failure | Corn flake liking | Inverse variance weighted | 5 | 0.347 | 0.515 | 0.500 |
| ebi-fl187-GCST90094745 | finngen_R11_E4_OVARFAIL | Primary ovarian failure | Corn flake liking | MR Egger | 5 | 3.059 | 3.067 | 0.392 |
| ebi-fl187-GCST90094745 | finngen_R11_E4_OVARFAIL | Primary ovarian failure | Corn flake liking | Simple mode | 5 | 0.292 | 0.996 | 0.784 |
| ebi-fl187-GCST90094745 | finngen_R11_E4_OVARFAIL | Primary ovarian failure | Corn flake liking | Weighted mode | 5 | 0.434 | 0.878 | 0.647 |
| ebi-fl187-GCST90094745 | finngen_R11_E4_OVARFAIL | Primary ovarian failure | Corn flake liking | Weighted median | 5 | 0.383 | 0.634 | 0.546 |
| ebi-fl187-GCST90094746 | finngen_R11_E4_OVARFAIL | Primary ovarian failure | Cream liking | Inverse variance weighted | 3 | -1.958 | 0.745 | 0.009 |
| ebi-fl187-GCST90094746 | finngen_R11_E4_OVARFAIL | Primary ovarian failure | Cream liking | MR Egger | 3 | -4.647 | 4.687 | 0.503 |
| ebi-fl187-GCST90094746 | finngen_R11_E4_OVARFAIL | Primary ovarian failure | Cream liking | Simple mode | 3 | -2.343 | 1.024 | 0.149 |
| ebi-fl187-GCST90094746 | finngen_R11_E4_OVARFAIL | Primary ovarian failure | Cream liking | Weighted mode | 3 | -1.721 | 1.043 | 0.241 |
| ebi-fl187-GCST90094746 | finngen_R11_E4_OVARFAIL | Primary ovarian failure | Cream liking | Weighted median | 3 | -1.970 | 0.859 | 0.022 |
| ebi-fl187-GCST90094747 | finngen_R11_E4_OVARFAIL | Primary ovarian failure | Crisps liking | Inverse variance weighted (multiplicative random effects) | 9 | -0.038 | 0.619 | 0.951 |
| ebi-fl187-GCST90094747 | finngen_R11_E4_OVARFAIL | Primary ovarian failure | Crisps liking | MR Egger | 9 | 5.372 | 2.414 | 0.061 |
| ebi-fl187-GCST90094747 | finngen_R11_E4_OVARFAIL | Primary ovarian failure | Crisps liking | Simple mode | 9 | -0.061 | 1.092 | 0.957 |
| ebi-fl187-GCST90094747 | finngen_R11_E4_OVARFAIL | Primary ovarian failure | Crisps liking | Weighted mode | 9 | 0.337 | 0.938 | 0.729 |
| ebi-fl187-GCST90094747 | finngen_R11_E4_OVARFAIL | Primary ovarian failure | Crisps liking | Weighted median | 9 | -0.083 | 0.614 | 0.892 |
| ebi-fl187-GCST90094748 | finngen_R11_E4_OVARFAIL | Primary ovarian failure | Croissant liking | Inverse variance weighted | 2 | 0.325 | 0.964 | 0.736 |
| ebi-fl187-GCST90094749 | finngen_R11_E4_OVARFAIL | Primary ovarian failure | Cucumber liking | Inverse variance weighted | 3 | -0.473 | 0.775 | 0.542 |
| ebi-fl187-GCST90094749 | finngen_R11_E4_OVARFAIL | Primary ovarian failure | Cucumber liking | MR Egger | 3 | -2.489 | 2.029 | 0.435 |
| ebi-fl187-GCST90094749 | finngen_R11_E4_OVARFAIL | Primary ovarian failure | Cucumber liking | Simple mode | 3 | 0.126 | 1.167 | 0.924 |
| ebi-fl187-GCST90094749 | finngen_R11_E4_OVARFAIL | Primary ovarian failure | Cucumber liking | Weighted mode | 3 | 0.118 | 1.183 | 0.930 |
| ebi-fl187-GCST90094749 | finngen_R11_E4_OVARFAIL | Primary ovarian failure | Cucumber liking | Weighted median | 3 | -0.071 | 1.030 | 0.945 |
| ebi-fl187-GCST90094750 | finngen_R11_E4_OVARFAIL | Primary ovarian failure | Curry liking | Inverse variance weighted | 7 | -0.731 | 0.548 | 0.182 |
| ebi-fl187-GCST90094750 | finngen_R11_E4_OVARFAIL | Primary ovarian failure | Curry liking | MR Egger | 7 | -1.781 | 2.309 | 0.475 |
| ebi-fl187-GCST90094750 | finngen_R11_E4_OVARFAIL | Primary ovarian failure | Curry liking | Simple mode | 7 | -0.947 | 0.970 | 0.366 |
| ebi-fl187-GCST90094750 | finngen_R11_E4_OVARFAIL | Primary ovarian failure | Curry liking | Weighted mode | 7 | -1.097 | 0.921 | 0.279 |
| ebi-fl187-GCST90094750 | finngen_R11_E4_OVARFAIL | Primary ovarian failure | Curry liking | Weighted median | 7 | -0.869 | 0.642 | 0.176 |
| ebi-fl187-GCST90094752 | finngen_R11_E4_OVARFAIL | Primary ovarian failure | Dark chocolate liking | Inverse variance weighted | 16 | 0.171 | 0.234 | 0.466 |
| ebi-fl187-GCST90094752 | finngen_R11_E4_OVARFAIL | Primary ovarian failure | Dark chocolate liking | MR Egger | 16 | -0.788 | 0.497 | 0.135 |
| ebi-fl187-GCST90094752 | finngen_R11_E4_OVARFAIL | Primary ovarian failure | Dark chocolate liking | Simple mode | 16 | 0.201 | 0.465 | 0.671 |
| ebi-fl187-GCST90094752 | finngen_R11_E4_OVARFAIL | Primary ovarian failure | Dark chocolate liking | Weighted mode | 16 | -0.011 | 0.291 | 0.971 |
| ebi-fl187-GCST90094752 | finngen_R11_E4_OVARFAIL | Primary ovarian failure | Dark chocolate liking | Weighted median | 16 | 0.042 | 0.272 | 0.879 |
| ebi-fl187-GCST90094755 | finngen_R11_E4_OVARFAIL | Primary ovarian failure | Diet fizzy drinks liking | Inverse variance weighted (multiplicative random effects) | 4 | 0.410 | 1.200 | 0.733 |
| ebi-fl187-GCST90094755 | finngen_R11_E4_OVARFAIL | Primary ovarian failure | Diet fizzy drinks liking | MR Egger | 4 | 11.077 | 3.880 | 0.104 |
| ebi-fl187-GCST90094755 | finngen_R11_E4_OVARFAIL | Primary ovarian failure | Diet fizzy drinks liking | Simple mode | 4 | -0.393 | 1.692 | 0.831 |
| ebi-fl187-GCST90094755 | finngen_R11_E4_OVARFAIL | Primary ovarian failure | Diet fizzy drinks liking | Weighted mode | 4 | -0.604 | 1.038 | 0.602 |
| ebi-fl187-GCST90094755 | finngen_R11_E4_OVARFAIL | Primary ovarian failure | Diet fizzy drinks liking | Weighted median | 4 | -0.228 | 0.898 | 0.799 |
| ebi-fl187-GCST90094756 | finngen_R11_E4_OVARFAIL | Primary ovarian failure | Dried fruit liking | Inverse variance weighted | 4 | 0.307 | 0.794 | 0.699 |
| ebi-fl187-GCST90094756 | finngen_R11_E4_OVARFAIL | Primary ovarian failure | Dried fruit liking | MR Egger | 4 | 3.730 | 4.215 | 0.470 |
| ebi-fl187-GCST90094756 | finngen_R11_E4_OVARFAIL | Primary ovarian failure | Dried fruit liking | Simple mode | 4 | 0.174 | 1.334 | 0.904 |
| ebi-fl187-GCST90094756 | finngen_R11_E4_OVARFAIL | Primary ovarian failure | Dried fruit liking | Weighted mode | 4 | 0.041 | 1.079 | 0.972 |
| ebi-fl187-GCST90094756 | finngen_R11_E4_OVARFAIL | Primary ovarian failure | Dried fruit liking | Weighted median | 4 | 0.172 | 0.974 | 0.860 |
| ebi-fl187-GCST90094757 | finngen_R11_E4_OVARFAIL | Primary ovarian failure | Eggs liking | Inverse variance weighted | 4 | -0.408 | 0.844 | 0.629 |
| ebi-fl187-GCST90094757 | finngen_R11_E4_OVARFAIL | Primary ovarian failure | Eggs liking | MR Egger | 4 | 2.409 | 6.316 | 0.740 |
| ebi-fl187-GCST90094757 | finngen_R11_E4_OVARFAIL | Primary ovarian failure | Eggs liking | Simple mode | 4 | -0.899 | 1.304 | 0.540 |
| ebi-fl187-GCST90094757 | finngen_R11_E4_OVARFAIL | Primary ovarian failure | Eggs liking | Weighted mode | 4 | -0.814 | 1.239 | 0.558 |
| ebi-fl187-GCST90094757 | finngen_R11_E4_OVARFAIL | Primary ovarian failure | Eggs liking | Weighted median | 4 | -0.474 | 0.971 | 0.625 |
| ebi-fl187-GCST90094758 | finngen_R11_E4_OVARFAIL | Primary ovarian failure | Extra virgin olive oil liking | Inverse variance weighted | 2 | -2.494 | 1.232 | 0.043 |
| ebi-fl187-GCST90094761 | finngen_R11_E4_OVARFAIL | Primary ovarian failure | F-fatty food liking | Inverse variance weighted | 6 | -0.694 | 0.425 | 0.103 |
| ebi-fl187-GCST90094761 | finngen_R11_E4_OVARFAIL | Primary ovarian failure | F-fatty food liking | MR Egger | 6 | -1.701 | 1.267 | 0.251 |
| ebi-fl187-GCST90094761 | finngen_R11_E4_OVARFAIL | Primary ovarian failure | F-fatty food liking | Simple mode | 6 | -0.977 | 0.768 | 0.259 |
| ebi-fl187-GCST90094761 | finngen_R11_E4_OVARFAIL | Primary ovarian failure | F-fatty food liking | Weighted mode | 6 | -1.138 | 0.691 | 0.160 |
| ebi-fl187-GCST90094761 | finngen_R11_E4_OVARFAIL | Primary ovarian failure | F-fatty food liking | Weighted median | 6 | -0.973 | 0.523 | 0.063 |
| ebi-fl187-GCST90094764 | finngen_R11_E4_OVARFAIL | Primary ovarian failure | Fried chicken liking | Inverse variance weighted | 2 | -0.173 | 0.662 | 0.794 |
| ebi-fl187-GCST90094765 | finngen_R11_E4_OVARFAIL | Primary ovarian failure | Fried fish liking | Inverse variance weighted | 5 | -0.239 | 0.721 | 0.740 |
| ebi-fl187-GCST90094765 | finngen_R11_E4_OVARFAIL | Primary ovarian failure | Fried fish liking | MR Egger | 5 | -0.683 | 5.261 | 0.905 |
| ebi-fl187-GCST90094765 | finngen_R11_E4_OVARFAIL | Primary ovarian failure | Fried fish liking | Simple mode | 5 | -0.445 | 0.878 | 0.639 |
| ebi-fl187-GCST90094765 | finngen_R11_E4_OVARFAIL | Primary ovarian failure | Fried fish liking | Weighted mode | 5 | -0.274 | 0.820 | 0.755 |
| ebi-fl187-GCST90094765 | finngen_R11_E4_OVARFAIL | Primary ovarian failure | Fried fish liking | Weighted median | 5 | 0.001 | 0.694 | 0.999 |
| ebi-fl187-GCST90094766 | finngen_R11_E4_OVARFAIL | Primary ovarian failure | Fruit liking | Inverse variance weighted | 9 | -0.805 | 0.750 | 0.283 |
| ebi-fl187-GCST90094766 | finngen_R11_E4_OVARFAIL | Primary ovarian failure | Fruit liking | MR Egger | 9 | -3.149 | 3.631 | 0.415 |
| ebi-fl187-GCST90094766 | finngen_R11_E4_OVARFAIL | Primary ovarian failure | Fruit liking | Simple mode | 9 | 0.166 | 1.438 | 0.911 |
| ebi-fl187-GCST90094766 | finngen_R11_E4_OVARFAIL | Primary ovarian failure | Fruit liking | Weighted mode | 9 | 0.064 | 1.232 | 0.960 |
| ebi-fl187-GCST90094766 | finngen_R11_E4_OVARFAIL | Primary ovarian failure | Fruit liking | Weighted median | 9 | -0.073 | 0.993 | 0.942 |
| ebi-fl187-GCST90094769 | finngen_R11_E4_OVARFAIL | Primary ovarian failure | Garlic liking | Inverse variance weighted | 8 | 0.261 | 0.306 | 0.393 |
| ebi-fl187-GCST90094769 | finngen_R11_E4_OVARFAIL | Primary ovarian failure | Garlic liking | MR Egger | 8 | 0.301 | 0.758 | 0.705 |
| ebi-fl187-GCST90094769 | finngen_R11_E4_OVARFAIL | Primary ovarian failure | Garlic liking | Simple mode | 8 | 0.845 | 0.668 | 0.247 |
| ebi-fl187-GCST90094769 | finngen_R11_E4_OVARFAIL | Primary ovarian failure | Garlic liking | Weighted mode | 8 | 0.340 | 0.440 | 0.464 |
| ebi-fl187-GCST90094769 | finngen_R11_E4_OVARFAIL | Primary ovarian failure | Garlic liking | Weighted median | 8 | 0.318 | 0.375 | 0.396 |
| ebi-fl187-GCST90094770 | finngen_R11_E4_OVARFAIL | Primary ovarian failure | Gherkins liking | Inverse variance weighted | 19 | -0.488 | 0.216 | 0.024 |
| ebi-fl187-GCST90094770 | finngen_R11_E4_OVARFAIL | Primary ovarian failure | Gherkins liking | MR Egger | 19 | -1.619 | 0.946 | 0.105 |
| ebi-fl187-GCST90094770 | finngen_R11_E4_OVARFAIL | Primary ovarian failure | Gherkins liking | Simple mode | 19 | -0.002 | 0.515 | 0.997 |
| ebi-fl187-GCST90094770 | finngen_R11_E4_OVARFAIL | Primary ovarian failure | Gherkins liking | Weighted mode | 19 | -0.587 | 0.431 | 0.190 |
| ebi-fl187-GCST90094770 | finngen_R11_E4_OVARFAIL | Primary ovarian failure | Gherkins liking | Weighted median | 19 | -0.591 | 0.307 | 0.054 |
| ebi-fl187-GCST90094771 | finngen_R11_E4_OVARFAIL | Primary ovarian failure | Globe artichoke liking | Inverse variance weighted | 8 | -0.277 | 0.359 | 0.440 |
| ebi-fl187-GCST90094771 | finngen_R11_E4_OVARFAIL | Primary ovarian failure | Globe artichoke liking | MR Egger | 8 | -0.009 | 1.529 | 0.995 |
| ebi-fl187-GCST90094771 | finngen_R11_E4_OVARFAIL | Primary ovarian failure | Globe artichoke liking | Simple mode | 8 | 0.014 | 0.600 | 0.982 |
| ebi-fl187-GCST90094771 | finngen_R11_E4_OVARFAIL | Primary ovarian failure | Globe artichoke liking | Weighted mode | 8 | 0.014 | 0.505 | 0.978 |
| ebi-fl187-GCST90094771 | finngen_R11_E4_OVARFAIL | Primary ovarian failure | Globe artichoke liking | Weighted median | 8 | -0.098 | 0.409 | 0.811 |
| ebi-fl187-GCST90094773 | finngen_R11_E4_OVARFAIL | Primary ovarian failure | Goat cheese liking | Inverse variance weighted | 8 | 0.192 | 0.342 | 0.573 |
| ebi-fl187-GCST90094773 | finngen_R11_E4_OVARFAIL | Primary ovarian failure | Goat cheese liking | MR Egger | 8 | 1.124 | 1.989 | 0.593 |
| ebi-fl187-GCST90094773 | finngen_R11_E4_OVARFAIL | Primary ovarian failure | Goat cheese liking | Simple mode | 8 | 0.092 | 0.747 | 0.906 |
| ebi-fl187-GCST90094773 | finngen_R11_E4_OVARFAIL | Primary ovarian failure | Goat cheese liking | Weighted mode | 8 | 0.052 | 0.731 | 0.946 |
| ebi-fl187-GCST90094773 | finngen_R11_E4_OVARFAIL | Primary ovarian failure | Goat cheese liking | Weighted median | 8 | 0.229 | 0.428 | 0.593 |
| ebi-fl187-GCST90094774 | finngen_R11_E4_OVARFAIL | Primary ovarian failure | Grapefruit liking | Inverse variance weighted | 8 | -0.254 | 0.312 | 0.414 |
| ebi-fl187-GCST90094774 | finngen_R11_E4_OVARFAIL | Primary ovarian failure | Grapefruit liking | MR Egger | 8 | -0.061 | 0.737 | 0.937 |
| ebi-fl187-GCST90094774 | finngen_R11_E4_OVARFAIL | Primary ovarian failure | Grapefruit liking | Simple mode | 8 | -1.353 | 0.779 | 0.126 |
| ebi-fl187-GCST90094774 | finngen_R11_E4_OVARFAIL | Primary ovarian failure | Grapefruit liking | Weighted mode | 8 | 0.136 | 0.427 | 0.760 |
| ebi-fl187-GCST90094774 | finngen_R11_E4_OVARFAIL | Primary ovarian failure | Grapefruit liking | Weighted median | 8 | 0.019 | 0.351 | 0.956 |
| ebi-fl187-GCST90094775 | finngen_R11_E4_OVARFAIL | Primary ovarian failure | Green olives liking | Inverse variance weighted | 25 | -0.203 | 0.176 | 0.250 |
| ebi-fl187-GCST90094775 | finngen_R11_E4_OVARFAIL | Primary ovarian failure | Green olives liking | MR Egger | 25 | -0.608 | 0.780 | 0.444 |
| ebi-fl187-GCST90094775 | finngen_R11_E4_OVARFAIL | Primary ovarian failure | Green olives liking | Simple mode | 25 | -0.483 | 0.459 | 0.303 |
| ebi-fl187-GCST90094775 | finngen_R11_E4_OVARFAIL | Primary ovarian failure | Green olives liking | Weighted mode | 25 | -0.440 | 0.460 | 0.348 |
| ebi-fl187-GCST90094775 | finngen_R11_E4_OVARFAIL | Primary ovarian failure | Green olives liking | Weighted median | 25 | -0.324 | 0.257 | 0.208 |
| ebi-fl187-GCST90094776 | finngen_R11_E4_OVARFAIL | Primary ovarian failure | Haddock liking | Inverse variance weighted | 5 | 0.295 | 0.603 | 0.625 |
| ebi-fl187-GCST90094776 | finngen_R11_E4_OVARFAIL | Primary ovarian failure | Haddock liking | MR Egger | 5 | -0.688 | 4.805 | 0.895 |
| ebi-fl187-GCST90094776 | finngen_R11_E4_OVARFAIL | Primary ovarian failure | Haddock liking | Simple mode | 5 | -0.221 | 1.013 | 0.838 |
| ebi-fl187-GCST90094776 | finngen_R11_E4_OVARFAIL | Primary ovarian failure | Haddock liking | Weighted mode | 5 | -0.273 | 1.028 | 0.804 |
| ebi-fl187-GCST90094776 | finngen_R11_E4_OVARFAIL | Primary ovarian failure | Haddock liking | Weighted median | 5 | -0.120 | 0.743 | 0.872 |
| ebi-fl187-GCST90094777 | finngen_R11_E4_OVARFAIL | Primary ovarian failure | Ham liking | Inverse variance weighted | 10 | 0.129 | 0.396 | 0.744 |
| ebi-fl187-GCST90094777 | finngen_R11_E4_OVARFAIL | Primary ovarian failure | Ham liking | MR Egger | 10 | 0.119 | 1.475 | 0.937 |
| ebi-fl187-GCST90094777 | finngen_R11_E4_OVARFAIL | Primary ovarian failure | Ham liking | Simple mode | 10 | 0.791 | 0.928 | 0.416 |
| ebi-fl187-GCST90094777 | finngen_R11_E4_OVARFAIL | Primary ovarian failure | Ham liking | Weighted mode | 10 | 0.489 | 0.788 | 0.550 |
| ebi-fl187-GCST90094777 | finngen_R11_E4_OVARFAIL | Primary ovarian failure | Ham liking | Weighted median | 10 | 0.368 | 0.507 | 0.468 |
| ebi-fl187-GCST90094778 | finngen_R11_E4_OVARFAIL | Primary ovarian failure | Hard cheese liking | Inverse variance weighted | 3 | -0.661 | 0.935 | 0.479 |
| ebi-fl187-GCST90094778 | finngen_R11_E4_OVARFAIL | Primary ovarian failure | Hard cheese liking | MR Egger | 3 | 1.640 | 2.977 | 0.679 |
| ebi-fl187-GCST90094778 | finngen_R11_E4_OVARFAIL | Primary ovarian failure | Hard cheese liking | Simple mode | 3 | -1.224 | 1.303 | 0.447 |
| ebi-fl187-GCST90094778 | finngen_R11_E4_OVARFAIL | Primary ovarian failure | Hard cheese liking | Weighted mode | 3 | -1.238 | 1.293 | 0.439 |
| ebi-fl187-GCST90094778 | finngen_R11_E4_OVARFAIL | Primary ovarian failure | Hard cheese liking | Weighted median | 3 | -1.068 | 1.141 | 0.349 |
| ebi-fl187-GCST90094781 | finngen_R11_E4_OVARFAIL | Primary ovarian failure | Herring liking | Inverse variance weighted | 18 | -0.134 | 0.254 | 0.597 |
| ebi-fl187-GCST90094781 | finngen_R11_E4_OVARFAIL | Primary ovarian failure | Herring liking | MR Egger | 18 | -0.130 | 1.120 | 0.909 |
| ebi-fl187-GCST90094781 | finngen_R11_E4_OVARFAIL | Primary ovarian failure | Herring liking | Simple mode | 18 | -0.387 | 0.602 | 0.528 |
| ebi-fl187-GCST90094781 | finngen_R11_E4_OVARFAIL | Primary ovarian failure | Herring liking | Weighted mode | 18 | -0.283 | 0.581 | 0.632 |
| ebi-fl187-GCST90094781 | finngen_R11_E4_OVARFAIL | Primary ovarian failure | Herring liking | Weighted median | 18 | -0.150 | 0.311 | 0.630 |
| ebi-fl187-GCST90094782 | finngen_R11_E4_OVARFAIL | Primary ovarian failure | Honey liking | Wald ratio | 1 | 0.158 | 1.294 | 0.903 |
| ebi-fl187-GCST90094783 | finngen_R11_E4_OVARFAIL | Primary ovarian failure | Horseradish liking | Inverse variance weighted | 23 | -0.206 | 0.173 | 0.235 |
| ebi-fl187-GCST90094783 | finngen_R11_E4_OVARFAIL | Primary ovarian failure | Horseradish liking | MR Egger | 23 | -0.405 | 0.572 | 0.487 |
| ebi-fl187-GCST90094783 | finngen_R11_E4_OVARFAIL | Primary ovarian failure | Horseradish liking | Simple mode | 23 | -0.349 | 0.469 | 0.465 |
| ebi-fl187-GCST90094783 | finngen_R11_E4_OVARFAIL | Primary ovarian failure | Horseradish liking | Weighted mode | 23 | -0.492 | 0.432 | 0.268 |
| ebi-fl187-GCST90094783 | finngen_R11_E4_OVARFAIL | Primary ovarian failure | Horseradish liking | Weighted median | 23 | -0.275 | 0.251 | 0.273 |
| ebi-fl187-GCST90094784 | finngen_R11_E4_OVARFAIL | Primary ovarian failure | Ice cream liking | Inverse variance weighted | 8 | 0.502 | 0.477 | 0.293 |
| ebi-fl187-GCST90094784 | finngen_R11_E4_OVARFAIL | Primary ovarian failure | Ice cream liking | MR Egger | 8 | 0.434 | 2.431 | 0.864 |
| ebi-fl187-GCST90094784 | finngen_R11_E4_OVARFAIL | Primary ovarian failure | Ice cream liking | Simple mode | 8 | 1.873 | 1.008 | 0.106 |
| ebi-fl187-GCST90094784 | finngen_R11_E4_OVARFAIL | Primary ovarian failure | Ice cream liking | Weighted mode | 8 | 0.610 | 0.744 | 0.439 |
| ebi-fl187-GCST90094784 | finngen_R11_E4_OVARFAIL | Primary ovarian failure | Ice cream liking | Weighted median | 8 | 0.519 | 0.573 | 0.365 |
| ebi-fl187-GCST90094786 | finngen_R11_E4_OVARFAIL | Primary ovarian failure | Jam liking | Inverse variance weighted | 6 | 0.174 | 0.562 | 0.756 |
| ebi-fl187-GCST90094786 | finngen_R11_E4_OVARFAIL | Primary ovarian failure | Jam liking | MR Egger | 6 | 0.115 | 5.909 | 0.985 |
| ebi-fl187-GCST90094786 | finngen_R11_E4_OVARFAIL | Primary ovarian failure | Jam liking | Simple mode | 6 | 0.054 | 1.043 | 0.961 |
| ebi-fl187-GCST90094786 | finngen_R11_E4_OVARFAIL | Primary ovarian failure | Jam liking | Weighted mode | 6 | 0.111 | 1.036 | 0.919 |
| ebi-fl187-GCST90094786 | finngen_R11_E4_OVARFAIL | Primary ovarian failure | Jam liking | Weighted median | 6 | 0.172 | 0.697 | 0.805 |
| ebi-fl187-GCST90094788 | finngen_R11_E4_OVARFAIL | Primary ovarian failure | Kiwi liking | Inverse variance weighted | 3 | -0.194 | 0.733 | 0.792 |
| ebi-fl187-GCST90094788 | finngen_R11_E4_OVARFAIL | Primary ovarian failure | Kiwi liking | MR Egger | 3 | 2.077 | 1.832 | 0.460 |
| ebi-fl187-GCST90094788 | finngen_R11_E4_OVARFAIL | Primary ovarian failure | Kiwi liking | Simple mode | 3 | 0.109 | 1.168 | 0.934 |
| ebi-fl187-GCST90094788 | finngen_R11_E4_OVARFAIL | Primary ovarian failure | Kiwi liking | Weighted mode | 3 | -0.069 | 1.069 | 0.954 |
| ebi-fl187-GCST90094788 | finngen_R11_E4_OVARFAIL | Primary ovarian failure | Kiwi liking | Weighted median | 3 | -0.132 | 0.878 | 0.880 |
| ebi-fl187-GCST90094789 | finngen_R11_E4_OVARFAIL | Primary ovarian failure | Lager liking | Inverse variance weighted | 10 | -0.098 | 0.426 | 0.818 |
| ebi-fl187-GCST90094789 | finngen_R11_E4_OVARFAIL | Primary ovarian failure | Lager liking | MR Egger | 10 | 1.335 | 1.659 | 0.444 |
| ebi-fl187-GCST90094789 | finngen_R11_E4_OVARFAIL | Primary ovarian failure | Lager liking | Simple mode | 10 | 0.254 | 0.721 | 0.733 |
| ebi-fl187-GCST90094789 | finngen_R11_E4_OVARFAIL | Primary ovarian failure | Lager liking | Weighted mode | 10 | -0.073 | 0.663 | 0.915 |
| ebi-fl187-GCST90094789 | finngen_R11_E4_OVARFAIL | Primary ovarian failure | Lager liking | Weighted median | 10 | -0.186 | 0.509 | 0.715 |
| ebi-fl187-GCST90094790 | finngen_R11_E4_OVARFAIL | Primary ovarian failure | Lamb liking | Inverse variance weighted | 7 | 0.136 | 0.383 | 0.723 |
| ebi-fl187-GCST90094790 | finngen_R11_E4_OVARFAIL | Primary ovarian failure | Lamb liking | MR Egger | 7 | 1.018 | 2.494 | 0.700 |
| ebi-fl187-GCST90094790 | finngen_R11_E4_OVARFAIL | Primary ovarian failure | Lamb liking | Simple mode | 7 | -0.048 | 0.710 | 0.948 |
| ebi-fl187-GCST90094790 | finngen_R11_E4_OVARFAIL | Primary ovarian failure | Lamb liking | Weighted mode | 7 | -0.064 | 0.677 | 0.927 |
| ebi-fl187-GCST90094790 | finngen_R11_E4_OVARFAIL | Primary ovarian failure | Lamb liking | Weighted median | 7 | 0.095 | 0.472 | 0.841 |
| ebi-fl187-GCST90094792 | finngen_R11_E4_OVARFAIL | Primary ovarian failure | Lemon liking | Inverse variance weighted | 5 | -0.031 | 0.704 | 0.965 |
| ebi-fl187-GCST90094792 | finngen_R11_E4_OVARFAIL | Primary ovarian failure | Lemon liking | MR Egger | 5 | -2.205 | 7.792 | 0.796 |
| ebi-fl187-GCST90094792 | finngen_R11_E4_OVARFAIL | Primary ovarian failure | Lemon liking | Simple mode | 5 | -0.023 | 1.183 | 0.985 |
| ebi-fl187-GCST90094792 | finngen_R11_E4_OVARFAIL | Primary ovarian failure | Lemon liking | Weighted mode | 5 | -0.023 | 1.207 | 0.986 |
| ebi-fl187-GCST90094792 | finngen_R11_E4_OVARFAIL | Primary ovarian failure | Lemon liking | Weighted median | 5 | -0.003 | 0.907 | 0.998 |
| ebi-fl187-GCST90094793 | finngen_R11_E4_OVARFAIL | Primary ovarian failure | F-lentils/beans liking | Inverse variance weighted | 2 | -0.581 | 1.004 | 0.563 |
| ebi-fl187-GCST90094794 | finngen_R11_E4_OVARFAIL | Primary ovarian failure | Liver liking | Inverse variance weighted | 11 | -0.114 | 0.292 | 0.697 |
| ebi-fl187-GCST90094794 | finngen_R11_E4_OVARFAIL | Primary ovarian failure | Liver liking | MR Egger | 11 | -2.771 | 1.356 | 0.071 |
| ebi-fl187-GCST90094794 | finngen_R11_E4_OVARFAIL | Primary ovarian failure | Liver liking | Simple mode | 11 | -0.436 | 0.566 | 0.459 |
| ebi-fl187-GCST90094794 | finngen_R11_E4_OVARFAIL | Primary ovarian failure | Liver liking | Weighted mode | 11 | -0.541 | 0.425 | 0.232 |
| ebi-fl187-GCST90094794 | finngen_R11_E4_OVARFAIL | Primary ovarian failure | Liver liking | Weighted median | 11 | -0.394 | 0.361 | 0.276 |
| ebi-fl187-GCST90094796 | finngen_R11_E4_OVARFAIL | Primary ovarian failure | Mackerel liking | Inverse variance weighted | 14 | -0.550 | 0.256 | 0.031 |
| ebi-fl187-GCST90094796 | finngen_R11_E4_OVARFAIL | Primary ovarian failure | Mackerel liking | MR Egger | 14 | -1.401 | 1.708 | 0.428 |
| ebi-fl187-GCST90094796 | finngen_R11_E4_OVARFAIL | Primary ovarian failure | Mackerel liking | Simple mode | 14 | -0.742 | 0.533 | 0.187 |
| ebi-fl187-GCST90094796 | finngen_R11_E4_OVARFAIL | Primary ovarian failure | Mackerel liking | Weighted mode | 14 | -0.665 | 0.537 | 0.238 |
| ebi-fl187-GCST90094796 | finngen_R11_E4_OVARFAIL | Primary ovarian failure | Mackerel liking | Weighted median | 14 | -0.617 | 0.329 | 0.061 |
| ebi-fl187-GCST90094797 | finngen_R11_E4_OVARFAIL | Primary ovarian failure | Marzipan liking | Inverse variance weighted | 6 | 0.328 | 0.476 | 0.491 |
| ebi-fl187-GCST90094797 | finngen_R11_E4_OVARFAIL | Primary ovarian failure | Marzipan liking | MR Egger | 6 | -2.294 | 4.583 | 0.643 |
| ebi-fl187-GCST90094797 | finngen_R11_E4_OVARFAIL | Primary ovarian failure | Marzipan liking | Simple mode | 6 | 0.935 | 0.944 | 0.367 |
| ebi-fl187-GCST90094797 | finngen_R11_E4_OVARFAIL | Primary ovarian failure | Marzipan liking | Weighted mode | 6 | 0.837 | 0.967 | 0.426 |
| ebi-fl187-GCST90094797 | finngen_R11_E4_OVARFAIL | Primary ovarian failure | Marzipan liking | Weighted median | 6 | 0.501 | 0.579 | 0.388 |
| ebi-fl187-GCST90094798 | finngen_R11_E4_OVARFAIL | Primary ovarian failure | Mayonnaise liking | Inverse variance weighted | 9 | -0.141 | 0.381 | 0.712 |
| ebi-fl187-GCST90094798 | finngen_R11_E4_OVARFAIL | Primary ovarian failure | Mayonnaise liking | MR Egger | 9 | 0.197 | 1.985 | 0.924 |
| ebi-fl187-GCST90094798 | finngen_R11_E4_OVARFAIL | Primary ovarian failure | Mayonnaise liking | Simple mode | 9 | -0.487 | 0.719 | 0.517 |
| ebi-fl187-GCST90094798 | finngen_R11_E4_OVARFAIL | Primary ovarian failure | Mayonnaise liking | Weighted mode | 9 | -0.487 | 0.679 | 0.493 |
| ebi-fl187-GCST90094798 | finngen_R11_E4_OVARFAIL | Primary ovarian failure | Mayonnaise liking | Weighted median | 9 | -0.339 | 0.470 | 0.471 |
| ebi-fl187-GCST90094800 | finngen_R11_E4_OVARFAIL | Primary ovarian failure | Melon liking | Inverse variance weighted | 2 | -0.832 | 1.247 | 0.505 |
| ebi-fl187-GCST90094801 | finngen_R11_E4_OVARFAIL | Primary ovarian failure | Milk chocolate liking | Inverse variance weighted | 5 | 0.186 | 0.466 | 0.689 |
| ebi-fl187-GCST90094801 | finngen_R11_E4_OVARFAIL | Primary ovarian failure | Milk chocolate liking | MR Egger | 5 | 2.669 | 2.959 | 0.434 |
| ebi-fl187-GCST90094801 | finngen_R11_E4_OVARFAIL | Primary ovarian failure | Milk chocolate liking | Simple mode | 5 | -0.359 | 0.760 | 0.661 |
| ebi-fl187-GCST90094801 | finngen_R11_E4_OVARFAIL | Primary ovarian failure | Milk chocolate liking | Weighted mode | 5 | 0.483 | 0.717 | 0.537 |
| ebi-fl187-GCST90094801 | finngen_R11_E4_OVARFAIL | Primary ovarian failure | Milk chocolate liking | Weighted median | 5 | 0.251 | 0.528 | 0.634 |
| ebi-fl187-GCST90094803 | finngen_R11_E4_OVARFAIL | Primary ovarian failure | Mushroom liking | Inverse variance weighted | 7 | 0.452 | 0.527 | 0.391 |
| ebi-fl187-GCST90094803 | finngen_R11_E4_OVARFAIL | Primary ovarian failure | Mushroom liking | MR Egger | 7 | -0.194 | 2.452 | 0.940 |
| ebi-fl187-GCST90094803 | finngen_R11_E4_OVARFAIL | Primary ovarian failure | Mushroom liking | Simple mode | 7 | -0.424 | 0.987 | 0.683 |
| ebi-fl187-GCST90094803 | finngen_R11_E4_OVARFAIL | Primary ovarian failure | Mushroom liking | Weighted mode | 7 | -0.293 | 0.822 | 0.733 |
| ebi-fl187-GCST90094803 | finngen_R11_E4_OVARFAIL | Primary ovarian failure | Mushroom liking | Weighted median | 7 | -0.024 | 0.683 | 0.972 |
| ebi-fl187-GCST90094805 | finngen_R11_E4_OVARFAIL | Primary ovarian failure | Onion liking | Inverse variance weighted | 5 | 0.108 | 0.512 | 0.833 |
| ebi-fl187-GCST90094805 | finngen_R11_E4_OVARFAIL | Primary ovarian failure | Onion liking | MR Egger | 5 | 0.727 | 1.227 | 0.595 |
| ebi-fl187-GCST90094805 | finngen_R11_E4_OVARFAIL | Primary ovarian failure | Onion liking | Simple mode | 5 | -0.620 | 0.943 | 0.547 |
| ebi-fl187-GCST90094805 | finngen_R11_E4_OVARFAIL | Primary ovarian failure | Onion liking | Weighted mode | 5 | 0.315 | 0.643 | 0.650 |
| ebi-fl187-GCST90094805 | finngen_R11_E4_OVARFAIL | Primary ovarian failure | Onion liking | Weighted median | 5 | 0.197 | 0.583 | 0.735 |
| ebi-fl187-GCST90094806 | finngen_R11_E4_OVARFAIL | Primary ovarian failure | Orange juice liking | Inverse variance weighted | 2 | -0.976 | 1.470 | 0.507 |
| ebi-fl187-GCST90094807 | finngen_R11_E4_OVARFAIL | Primary ovarian failure | Oranges liking | Inverse variance weighted | 6 | -0.944 | 0.614 | 0.125 |
| ebi-fl187-GCST90094807 | finngen_R11_E4_OVARFAIL | Primary ovarian failure | Oranges liking | MR Egger | 6 | -1.693 | 4.037 | 0.696 |
| ebi-fl187-GCST90094807 | finngen_R11_E4_OVARFAIL | Primary ovarian failure | Oranges liking | Simple mode | 6 | -1.182 | 1.074 | 0.321 |
| ebi-fl187-GCST90094807 | finngen_R11_E4_OVARFAIL | Primary ovarian failure | Oranges liking | Weighted mode | 6 | -1.230 | 0.897 | 0.229 |
| ebi-fl187-GCST90094807 | finngen_R11_E4_OVARFAIL | Primary ovarian failure | Oranges liking | Weighted median | 6 | -1.178 | 0.767 | 0.125 |
| ebi-fl187-GCST90094808 | finngen_R11_E4_OVARFAIL | Primary ovarian failure | Pasta liking | Wald ratio | 1 | 1.095 | 1.605 | 0.495 |
| ebi-fl187-GCST90094809 | finngen_R11_E4_OVARFAIL | Primary ovarian failure | Pears liking | Inverse variance weighted (multiplicative random effects) | 4 | 0.252 | 1.479 | 0.865 |
| ebi-fl187-GCST90094809 | finngen_R11_E4_OVARFAIL | Primary ovarian failure | Pears liking | MR Egger | 4 | 22.662 | 37.206 | 0.604 |
| ebi-fl187-GCST90094809 | finngen_R11_E4_OVARFAIL | Primary ovarian failure | Pears liking | Simple mode | 4 | 2.136 | 2.174 | 0.398 |
| ebi-fl187-GCST90094809 | finngen_R11_E4_OVARFAIL | Primary ovarian failure | Pears liking | Weighted mode | 4 | 2.238 | 1.828 | 0.308 |
| ebi-fl187-GCST90094809 | finngen_R11_E4_OVARFAIL | Primary ovarian failure | Pears liking | Weighted median | 4 | 0.857 | 1.013 | 0.397 |
| ebi-fl187-GCST90094810 | finngen_R11_E4_OVARFAIL | Primary ovarian failure | Pizza liking | Inverse variance weighted | 3 | 0.072 | 0.752 | 0.923 |
| ebi-fl187-GCST90094810 | finngen_R11_E4_OVARFAIL | Primary ovarian failure | Pizza liking | MR Egger | 3 | -10.261 | 7.094 | 0.385 |
| ebi-fl187-GCST90094810 | finngen_R11_E4_OVARFAIL | Primary ovarian failure | Pizza liking | Simple mode | 3 | -0.590 | 1.139 | 0.656 |
| ebi-fl187-GCST90094810 | finngen_R11_E4_OVARFAIL | Primary ovarian failure | Pizza liking | Weighted mode | 3 | -0.513 | 1.043 | 0.671 |
| ebi-fl187-GCST90094810 | finngen_R11_E4_OVARFAIL | Primary ovarian failure | Pizza liking | Weighted median | 3 | -0.335 | 0.885 | 0.705 |
| ebi-fl187-GCST90094811 | finngen_R11_E4_OVARFAIL | Primary ovarian failure | Plain yoghurt liking | Inverse variance weighted | 6 | 0.695 | 0.456 | 0.128 |
| ebi-fl187-GCST90094811 | finngen_R11_E4_OVARFAIL | Primary ovarian failure | Plain yoghurt liking | MR Egger | 6 | 7.211 | 5.997 | 0.295 |
| ebi-fl187-GCST90094811 | finngen_R11_E4_OVARFAIL | Primary ovarian failure | Plain yoghurt liking | Simple mode | 6 | 0.930 | 0.946 | 0.370 |
| ebi-fl187-GCST90094811 | finngen_R11_E4_OVARFAIL | Primary ovarian failure | Plain yoghurt liking | Weighted mode | 6 | 0.957 | 0.888 | 0.330 |
| ebi-fl187-GCST90094811 | finngen_R11_E4_OVARFAIL | Primary ovarian failure | Plain yoghurt liking | Weighted median | 6 | 0.928 | 0.609 | 0.128 |
| ebi-fl187-GCST90094812 | finngen_R11_E4_OVARFAIL | Primary ovarian failure | Plum liking | Inverse variance weighted | 4 | 0.057 | 0.599 | 0.924 |
| ebi-fl187-GCST90094812 | finngen_R11_E4_OVARFAIL | Primary ovarian failure | Plum liking | MR Egger | 4 | 1.775 | 3.198 | 0.635 |
| ebi-fl187-GCST90094812 | finngen_R11_E4_OVARFAIL | Primary ovarian failure | Plum liking | Simple mode | 4 | 0.170 | 1.002 | 0.876 |
| ebi-fl187-GCST90094812 | finngen_R11_E4_OVARFAIL | Primary ovarian failure | Plum liking | Weighted mode | 4 | 0.053 | 0.900 | 0.957 |
| ebi-fl187-GCST90094812 | finngen_R11_E4_OVARFAIL | Primary ovarian failure | Plum liking | Weighted median | 4 | 0.046 | 0.725 | 0.950 |
| ebi-fl187-GCST90094813 | finngen_R11_E4_OVARFAIL | Primary ovarian failure | Pollock liking | Inverse variance weighted | 4 | 0.274 | 0.563 | 0.626 |
| ebi-fl187-GCST90094813 | finngen_R11_E4_OVARFAIL | Primary ovarian failure | Pollock liking | MR Egger | 4 | 6.390 | 7.070 | 0.461 |
| ebi-fl187-GCST90094813 | finngen_R11_E4_OVARFAIL | Primary ovarian failure | Pollock liking | Simple mode | 4 | -0.021 | 0.929 | 0.983 |
| ebi-fl187-GCST90094813 | finngen_R11_E4_OVARFAIL | Primary ovarian failure | Pollock liking | Weighted mode | 4 | -0.012 | 0.897 | 0.990 |
| ebi-fl187-GCST90094813 | finngen_R11_E4_OVARFAIL | Primary ovarian failure | Pollock liking | Weighted median | 4 | 0.055 | 0.686 | 0.936 |
| ebi-fl187-GCST90094814 | finngen_R11_E4_OVARFAIL | Primary ovarian failure | Pork chop liking | Inverse variance weighted | 9 | 0.117 | 0.357 | 0.743 |
| ebi-fl187-GCST90094814 | finngen_R11_E4_OVARFAIL | Primary ovarian failure | Pork chop liking | MR Egger | 9 | -1.148 | 1.732 | 0.529 |
| ebi-fl187-GCST90094814 | finngen_R11_E4_OVARFAIL | Primary ovarian failure | Pork chop liking | Simple mode | 9 | -0.380 | 0.689 | 0.596 |
| ebi-fl187-GCST90094814 | finngen_R11_E4_OVARFAIL | Primary ovarian failure | Pork chop liking | Weighted mode | 9 | -0.347 | 0.570 | 0.559 |
| ebi-fl187-GCST90094814 | finngen_R11_E4_OVARFAIL | Primary ovarian failure | Pork chop liking | Weighted median | 9 | -0.229 | 0.467 | 0.624 |
| ebi-fl187-GCST90094815 | finngen_R11_E4_OVARFAIL | Primary ovarian failure | Porridge liking | Inverse variance weighted | 9 | -0.485 | 0.343 | 0.158 |
| ebi-fl187-GCST90094815 | finngen_R11_E4_OVARFAIL | Primary ovarian failure | Porridge liking | MR Egger | 9 | 0.562 | 1.220 | 0.659 |
| ebi-fl187-GCST90094815 | finngen_R11_E4_OVARFAIL | Primary ovarian failure | Porridge liking | Simple mode | 9 | -0.966 | 0.790 | 0.256 |
| ebi-fl187-GCST90094815 | finngen_R11_E4_OVARFAIL | Primary ovarian failure | Porridge liking | Weighted mode | 9 | 0.010 | 0.560 | 0.986 |
| ebi-fl187-GCST90094815 | finngen_R11_E4_OVARFAIL | Primary ovarian failure | Porridge liking | Weighted median | 9 | -0.351 | 0.453 | 0.438 |
| ebi-fl187-GCST90094817 | finngen_R11_E4_OVARFAIL | Primary ovarian failure | Prawns liking | Inverse variance weighted | 20 | 0.146 | 0.215 | 0.496 |
| ebi-fl187-GCST90094817 | finngen_R11_E4_OVARFAIL | Primary ovarian failure | Prawns liking | MR Egger | 20 | 0.095 | 0.711 | 0.896 |
| ebi-fl187-GCST90094817 | finngen_R11_E4_OVARFAIL | Primary ovarian failure | Prawns liking | Simple mode | 20 | 0.236 | 0.466 | 0.619 |
| ebi-fl187-GCST90094817 | finngen_R11_E4_OVARFAIL | Primary ovarian failure | Prawns liking | Weighted mode | 20 | 0.108 | 0.358 | 0.767 |
| ebi-fl187-GCST90094817 | finngen_R11_E4_OVARFAIL | Primary ovarian failure | Prawns liking | Weighted median | 20 | 0.094 | 0.300 | 0.753 |
| ebi-fl187-GCST90094818 | finngen_R11_E4_OVARFAIL | Primary ovarian failure | Raw carrot liking | Inverse variance weighted (multiplicative random effects) | 12 | -0.802 | 0.620 | 0.196 |
| ebi-fl187-GCST90094818 | finngen_R11_E4_OVARFAIL | Primary ovarian failure | Raw carrot liking | MR Egger | 12 | -9.778 | 4.182 | 0.041 |
| ebi-fl187-GCST90094818 | finngen_R11_E4_OVARFAIL | Primary ovarian failure | Raw carrot liking | Simple mode | 12 | -1.192 | 0.991 | 0.254 |
| ebi-fl187-GCST90094818 | finngen_R11_E4_OVARFAIL | Primary ovarian failure | Raw carrot liking | Weighted mode | 12 | -1.087 | 0.971 | 0.287 |
| ebi-fl187-GCST90094818 | finngen_R11_E4_OVARFAIL | Primary ovarian failure | Raw carrot liking | Weighted median | 12 | -1.098 | 0.678 | 0.106 |
| ebi-fl187-GCST90094819 | finngen_R11_E4_OVARFAIL | Primary ovarian failure | Red meat liking | Inverse variance weighted | 6 | 0.143 | 0.462 | 0.757 |
| ebi-fl187-GCST90094819 | finngen_R11_E4_OVARFAIL | Primary ovarian failure | Red meat liking | MR Egger | 6 | -0.466 | 1.950 | 0.823 |
| ebi-fl187-GCST90094819 | finngen_R11_E4_OVARFAIL | Primary ovarian failure | Red meat liking | Simple mode | 6 | -0.316 | 0.938 | 0.749 |
| ebi-fl187-GCST90094819 | finngen_R11_E4_OVARFAIL | Primary ovarian failure | Red meat liking | Weighted mode | 6 | -0.293 | 0.732 | 0.705 |
| ebi-fl187-GCST90094819 | finngen_R11_E4_OVARFAIL | Primary ovarian failure | Red meat liking | Weighted median | 6 | -0.248 | 0.573 | 0.665 |
| ebi-fl187-GCST90094820 | finngen_R11_E4_OVARFAIL | Primary ovarian failure | Red wine liking | Inverse variance weighted | 6 | -0.133 | 0.397 | 0.738 |
| ebi-fl187-GCST90094820 | finngen_R11_E4_OVARFAIL | Primary ovarian failure | Red wine liking | MR Egger | 6 | 0.451 | 1.362 | 0.757 |
| ebi-fl187-GCST90094820 | finngen_R11_E4_OVARFAIL | Primary ovarian failure | Red wine liking | Simple mode | 6 | 0.227 | 0.683 | 0.753 |
| ebi-fl187-GCST90094820 | finngen_R11_E4_OVARFAIL | Primary ovarian failure | Red wine liking | Weighted mode | 6 | 0.167 | 0.610 | 0.796 |
| ebi-fl187-GCST90094820 | finngen_R11_E4_OVARFAIL | Primary ovarian failure | Red wine liking | Weighted median | 6 | 0.128 | 0.488 | 0.794 |
| ebi-fl187-GCST90094821 | finngen_R11_E4_OVARFAIL | Primary ovarian failure | Roast chicken liking | Inverse variance weighted | 2 | 0.303 | 0.835 | 0.717 |
| ebi-fl187-GCST90094822 | finngen_R11_E4_OVARFAIL | Primary ovarian failure | Salad dressing liking | Inverse variance weighted | 6 | -0.695 | 0.612 | 0.257 |
| ebi-fl187-GCST90094822 | finngen_R11_E4_OVARFAIL | Primary ovarian failure | Salad dressing liking | MR Egger | 6 | -1.849 | 3.152 | 0.589 |
| ebi-fl187-GCST90094822 | finngen_R11_E4_OVARFAIL | Primary ovarian failure | Salad dressing liking | Simple mode | 6 | -1.920 | 1.120 | 0.147 |
| ebi-fl187-GCST90094822 | finngen_R11_E4_OVARFAIL | Primary ovarian failure | Salad dressing liking | Weighted mode | 6 | -0.060 | 1.011 | 0.955 |
| ebi-fl187-GCST90094822 | finngen_R11_E4_OVARFAIL | Primary ovarian failure | Salad dressing liking | Weighted median | 6 | -0.366 | 0.797 | 0.646 |
| ebi-fl187-GCST90094823 | finngen_R11_E4_OVARFAIL | Primary ovarian failure | Salad leaves liking | Inverse variance weighted (multiplicative random effects) | 4 | 0.145 | 1.551 | 0.926 |
| ebi-fl187-GCST90094823 | finngen_R11_E4_OVARFAIL | Primary ovarian failure | Salad leaves liking | MR Egger | 4 | -5.620 | 7.808 | 0.546 |
| ebi-fl187-GCST90094823 | finngen_R11_E4_OVARFAIL | Primary ovarian failure | Salad leaves liking | Simple mode | 4 | 1.749 | 1.381 | 0.295 |
| ebi-fl187-GCST90094823 | finngen_R11_E4_OVARFAIL | Primary ovarian failure | Salad leaves liking | Weighted mode | 4 | 1.660 | 1.342 | 0.304 |
| ebi-fl187-GCST90094823 | finngen_R11_E4_OVARFAIL | Primary ovarian failure | Salad leaves liking | Weighted median | 4 | 1.079 | 1.152 | 0.349 |
| ebi-fl187-GCST90094825 | finngen_R11_E4_OVARFAIL | Primary ovarian failure | Salami liking | Inverse variance weighted | 11 | -0.295 | 0.322 | 0.360 |
| ebi-fl187-GCST90094825 | finngen_R11_E4_OVARFAIL | Primary ovarian failure | Salami liking | MR Egger | 11 | -0.514 | 2.299 | 0.828 |
| ebi-fl187-GCST90094825 | finngen_R11_E4_OVARFAIL | Primary ovarian failure | Salami liking | Simple mode | 11 | -0.305 | 0.719 | 0.680 |
| ebi-fl187-GCST90094825 | finngen_R11_E4_OVARFAIL | Primary ovarian failure | Salami liking | Weighted mode | 11 | -0.335 | 0.726 | 0.654 |
| ebi-fl187-GCST90094825 | finngen_R11_E4_OVARFAIL | Primary ovarian failure | Salami liking | Weighted median | 11 | -0.330 | 0.420 | 0.432 |
| ebi-fl187-GCST90094826 | finngen_R11_E4_OVARFAIL | Primary ovarian failure | Salmon liking | Inverse variance weighted | 12 | 0.449 | 0.399 | 0.260 |
| ebi-fl187-GCST90094826 | finngen_R11_E4_OVARFAIL | Primary ovarian failure | Salmon liking | MR Egger | 12 | 1.725 | 3.492 | 0.632 |
| ebi-fl187-GCST90094826 | finngen_R11_E4_OVARFAIL | Primary ovarian failure | Salmon liking | Simple mode | 12 | 0.503 | 0.852 | 0.566 |
| ebi-fl187-GCST90094826 | finngen_R11_E4_OVARFAIL | Primary ovarian failure | Salmon liking | Weighted mode | 12 | 0.744 | 0.746 | 0.340 |
| ebi-fl187-GCST90094826 | finngen_R11_E4_OVARFAIL | Primary ovarian failure | Salmon liking | Weighted median | 12 | 0.584 | 0.544 | 0.283 |
| ebi-fl187-GCST90094827 | finngen_R11_E4_OVARFAIL | Primary ovarian failure | F-salty food liking | Inverse variance weighted | 7 | -0.365 | 0.390 | 0.349 |
| ebi-fl187-GCST90094827 | finngen_R11_E4_OVARFAIL | Primary ovarian failure | F-salty food liking | MR Egger | 7 | -0.722 | 1.343 | 0.614 |
| ebi-fl187-GCST90094827 | finngen_R11_E4_OVARFAIL | Primary ovarian failure | F-salty food liking | Simple mode | 7 | -0.245 | 0.670 | 0.727 |
| ebi-fl187-GCST90094827 | finngen_R11_E4_OVARFAIL | Primary ovarian failure | F-salty food liking | Weighted mode | 7 | -0.159 | 0.664 | 0.819 |
| ebi-fl187-GCST90094827 | finngen_R11_E4_OVARFAIL | Primary ovarian failure | F-salty food liking | Weighted median | 7 | -0.236 | 0.409 | 0.563 |
| ebi-fl187-GCST90094828 | finngen_R11_E4_OVARFAIL | Primary ovarian failure | Salty food liking | Inverse variance weighted | 13 | -0.589 | 0.305 | 0.054 |
| ebi-fl187-GCST90094828 | finngen_R11_E4_OVARFAIL | Primary ovarian failure | Salty food liking | MR Egger | 13 | -0.646 | 0.953 | 0.512 |
| ebi-fl187-GCST90094828 | finngen_R11_E4_OVARFAIL | Primary ovarian failure | Salty food liking | Simple mode | 13 | -0.473 | 0.626 | 0.465 |
| ebi-fl187-GCST90094828 | finngen_R11_E4_OVARFAIL | Primary ovarian failure | Salty food liking | Weighted mode | 13 | -0.088 | 0.618 | 0.889 |
| ebi-fl187-GCST90094828 | finngen_R11_E4_OVARFAIL | Primary ovarian failure | Salty food liking | Weighted median | 13 | -0.375 | 0.408 | 0.358 |
| ebi-fl187-GCST90094829 | finngen_R11_E4_OVARFAIL | Primary ovarian failure | Salty pretzels liking | Inverse variance weighted | 5 | -0.562 | 0.496 | 0.257 |
| ebi-fl187-GCST90094829 | finngen_R11_E4_OVARFAIL | Primary ovarian failure | Salty pretzels liking | MR Egger | 5 | -1.318 | 1.410 | 0.419 |
| ebi-fl187-GCST90094829 | finngen_R11_E4_OVARFAIL | Primary ovarian failure | Salty pretzels liking | Simple mode | 5 | -0.307 | 0.867 | 0.741 |
| ebi-fl187-GCST90094829 | finngen_R11_E4_OVARFAIL | Primary ovarian failure | Salty pretzels liking | Weighted mode | 5 | -0.195 | 0.767 | 0.812 |
| ebi-fl187-GCST90094829 | finngen_R11_E4_OVARFAIL | Primary ovarian failure | Salty pretzels liking | Weighted median | 5 | -0.427 | 0.596 | 0.473 |
| ebi-fl187-GCST90094830 | finngen_R11_E4_OVARFAIL | Primary ovarian failure | Sardines liking | Inverse variance weighted | 16 | -0.016 | 0.255 | 0.950 |
| ebi-fl187-GCST90094830 | finngen_R11_E4_OVARFAIL | Primary ovarian failure | Sardines liking | MR Egger | 16 | -0.010 | 1.248 | 0.994 |
| ebi-fl187-GCST90094830 | finngen_R11_E4_OVARFAIL | Primary ovarian failure | Sardines liking | Simple mode | 16 | -0.573 | 0.630 | 0.377 |
| ebi-fl187-GCST90094830 | finngen_R11_E4_OVARFAIL | Primary ovarian failure | Sardines liking | Weighted mode | 16 | -0.281 | 0.648 | 0.671 |
| ebi-fl187-GCST90094830 | finngen_R11_E4_OVARFAIL | Primary ovarian failure | Sardines liking | Weighted median | 16 | -0.063 | 0.357 | 0.860 |
| ebi-fl187-GCST90094832 | finngen_R11_E4_OVARFAIL | Primary ovarian failure | Sausages liking | Inverse variance weighted | 3 | -0.035 | 0.639 | 0.957 |
| ebi-fl187-GCST90094832 | finngen_R11_E4_OVARFAIL | Primary ovarian failure | Sausages liking | MR Egger | 3 | -3.072 | 2.413 | 0.424 |
| ebi-fl187-GCST90094832 | finngen_R11_E4_OVARFAIL | Primary ovarian failure | Sausages liking | Simple mode | 3 | -0.580 | 1.004 | 0.622 |
| ebi-fl187-GCST90094832 | finngen_R11_E4_OVARFAIL | Primary ovarian failure | Sausages liking | Weighted mode | 3 | -0.309 | 0.689 | 0.698 |
| ebi-fl187-GCST90094832 | finngen_R11_E4_OVARFAIL | Primary ovarian failure | Sausages liking | Weighted median | 3 | -0.247 | 0.734 | 0.737 |
| ebi-fl187-GCST90094838 | finngen_R11_E4_OVARFAIL | Primary ovarian failure | Shellfish liking | Inverse variance weighted | 31 | -0.037 | 0.146 | 0.802 |
| ebi-fl187-GCST90094838 | finngen_R11_E4_OVARFAIL | Primary ovarian failure | Shellfish liking | MR Egger | 31 | -0.571 | 0.414 | 0.178 |
| ebi-fl187-GCST90094838 | finngen_R11_E4_OVARFAIL | Primary ovarian failure | Shellfish liking | Simple mode | 31 | -0.359 | 0.416 | 0.395 |
| ebi-fl187-GCST90094838 | finngen_R11_E4_OVARFAIL | Primary ovarian failure | Shellfish liking | Weighted mode | 31 | -0.263 | 0.272 | 0.342 |
| ebi-fl187-GCST90094838 | finngen_R11_E4_OVARFAIL | Primary ovarian failure | Shellfish liking | Weighted median | 31 | -0.056 | 0.224 | 0.803 |
| ebi-fl187-GCST90094841 | finngen_R11_E4_OVARFAIL | Primary ovarian failure | Smoked fish liking | Inverse variance weighted | 7 | -0.497 | 0.483 | 0.304 |
| ebi-fl187-GCST90094841 | finngen_R11_E4_OVARFAIL | Primary ovarian failure | Smoked fish liking | MR Egger | 7 | 4.047 | 2.714 | 0.196 |
| ebi-fl187-GCST90094841 | finngen_R11_E4_OVARFAIL | Primary ovarian failure | Smoked fish liking | Simple mode | 7 | -0.383 | 0.887 | 0.681 |
| ebi-fl187-GCST90094841 | finngen_R11_E4_OVARFAIL | Primary ovarian failure | Smoked fish liking | Weighted mode | 7 | -0.265 | 0.889 | 0.776 |
| ebi-fl187-GCST90094841 | finngen_R11_E4_OVARFAIL | Primary ovarian failure | Smoked fish liking | Weighted median | 7 | -0.330 | 0.518 | 0.524 |
| ebi-fl187-GCST90094843 | finngen_R11_E4_OVARFAIL | Primary ovarian failure | Soft cheese liking | Inverse variance weighted | 2 | -0.764 | 1.179 | 0.517 |
| ebi-fl187-GCST90094845 | finngen_R11_E4_OVARFAIL | Primary ovarian failure | Soya milk liking | Inverse variance weighted | 3 | -1.152 | 0.567 | 0.042 |
| ebi-fl187-GCST90094845 | finngen_R11_E4_OVARFAIL | Primary ovarian failure | Soya milk liking | MR Egger | 3 | -0.807 | 2.238 | 0.780 |
| ebi-fl187-GCST90094845 | finngen_R11_E4_OVARFAIL | Primary ovarian failure | Soya milk liking | Simple mode | 3 | -0.977 | 0.746 | 0.320 |
| ebi-fl187-GCST90094845 | finngen_R11_E4_OVARFAIL | Primary ovarian failure | Soya milk liking | Weighted mode | 3 | -0.982 | 0.726 | 0.309 |
| ebi-fl187-GCST90094845 | finngen_R11_E4_OVARFAIL | Primary ovarian failure | Soya milk liking | Weighted median | 3 | -1.033 | 0.686 | 0.132 |
| ebi-fl187-GCST90094846 | finngen_R11_E4_OVARFAIL | Primary ovarian failure | Spicy food liking | Inverse variance weighted | 16 | -0.272 | 0.291 | 0.350 |
| ebi-fl187-GCST90094846 | finngen_R11_E4_OVARFAIL | Primary ovarian failure | Spicy food liking | MR Egger | 16 | -0.478 | 1.866 | 0.802 |
| ebi-fl187-GCST90094846 | finngen_R11_E4_OVARFAIL | Primary ovarian failure | Spicy food liking | Simple mode | 16 | 0.249 | 0.667 | 0.714 |
| ebi-fl187-GCST90094846 | finngen_R11_E4_OVARFAIL | Primary ovarian failure | Spicy food liking | Weighted mode | 16 | 0.280 | 0.724 | 0.704 |
| ebi-fl187-GCST90094846 | finngen_R11_E4_OVARFAIL | Primary ovarian failure | Spicy food liking | Weighted median | 16 | -0.064 | 0.371 | 0.862 |
| ebi-fl187-GCST90094847 | finngen_R11_E4_OVARFAIL | Primary ovarian failure | Spinach liking | Inverse variance weighted | 5 | 0.783 | 0.657 | 0.233 |
| ebi-fl187-GCST90094847 | finngen_R11_E4_OVARFAIL | Primary ovarian failure | Spinach liking | MR Egger | 5 | -0.526 | 2.377 | 0.839 |
| ebi-fl187-GCST90094847 | finngen_R11_E4_OVARFAIL | Primary ovarian failure | Spinach liking | Simple mode | 5 | 1.180 | 1.189 | 0.377 |
| ebi-fl187-GCST90094847 | finngen_R11_E4_OVARFAIL | Primary ovarian failure | Spinach liking | Weighted mode | 5 | 1.199 | 1.023 | 0.306 |
| ebi-fl187-GCST90094847 | finngen_R11_E4_OVARFAIL | Primary ovarian failure | Spinach liking | Weighted median | 5 | 1.118 | 0.816 | 0.171 |
| ebi-fl187-GCST90094848 | finngen_R11_E4_OVARFAIL | Primary ovarian failure | Spirits liking | Inverse variance weighted | 2 | 0.364 | 0.775 | 0.639 |
| ebi-fl187-GCST90094849 | finngen_R11_E4_OVARFAIL | Primary ovarian failure | Strawberries liking | Inverse variance weighted | 5 | -1.412 | 0.843 | 0.094 |
| ebi-fl187-GCST90094849 | finngen_R11_E4_OVARFAIL | Primary ovarian failure | Strawberries liking | MR Egger | 5 | -0.430 | 8.556 | 0.963 |
| ebi-fl187-GCST90094849 | finngen_R11_E4_OVARFAIL | Primary ovarian failure | Strawberries liking | Simple mode | 5 | -1.029 | 1.278 | 0.466 |
| ebi-fl187-GCST90094849 | finngen_R11_E4_OVARFAIL | Primary ovarian failure | Strawberries liking | Weighted mode | 5 | -0.945 | 1.382 | 0.532 |
| ebi-fl187-GCST90094849 | finngen_R11_E4_OVARFAIL | Primary ovarian failure | Strawberries liking | Weighted median | 5 | -1.194 | 1.033 | 0.248 |
| ebi-fl187-GCST90094853 | finngen_R11_E4_OVARFAIL | Primary ovarian failure | F-sweetened coffee drink liking | Inverse variance weighted | 4 | 0.358 | 0.570 | 0.530 |
| ebi-fl187-GCST90094853 | finngen_R11_E4_OVARFAIL | Primary ovarian failure | F-sweetened coffee drink liking | MR Egger | 4 | -5.133 | 3.613 | 0.291 |
| ebi-fl187-GCST90094853 | finngen_R11_E4_OVARFAIL | Primary ovarian failure | F-sweetened coffee drink liking | Simple mode | 4 | 1.122 | 1.132 | 0.395 |
| ebi-fl187-GCST90094853 | finngen_R11_E4_OVARFAIL | Primary ovarian failure | F-sweetened coffee drink liking | Weighted mode | 4 | 0.343 | 1.094 | 0.775 |
| ebi-fl187-GCST90094853 | finngen_R11_E4_OVARFAIL | Primary ovarian failure | F-sweetened coffee drink liking | Weighted median | 4 | 0.373 | 0.705 | 0.597 |
| ebi-fl187-GCST90094854 | finngen_R11_E4_OVARFAIL | Primary ovarian failure | F-sweet food liking | Inverse variance weighted | 12 | 0.843 | 0.398 | 0.034 |
| ebi-fl187-GCST90094854 | finngen_R11_E4_OVARFAIL | Primary ovarian failure | F-sweet food liking | MR Egger | 12 | 0.771 | 1.665 | 0.653 |
| ebi-fl187-GCST90094854 | finngen_R11_E4_OVARFAIL | Primary ovarian failure | F-sweet food liking | Simple mode | 12 | 0.943 | 0.626 | 0.160 |
| ebi-fl187-GCST90094854 | finngen_R11_E4_OVARFAIL | Primary ovarian failure | F-sweet food liking | Weighted mode | 12 | 0.662 | 0.535 | 0.242 |
| ebi-fl187-GCST90094854 | finngen_R11_E4_OVARFAIL | Primary ovarian failure | F-sweet food liking | Weighted median | 12 | 0.594 | 0.427 | 0.164 |
| ebi-fl187-GCST90094855 | finngen_R11_E4_OVARFAIL | Primary ovarian failure | Tea difference liking | Inverse variance weighted | 2 | -0.183 | 0.370 | 0.620 |
| ebi-fl187-GCST90094856 | finngen_R11_E4_OVARFAIL | Primary ovarian failure | Tea max liking | Wald ratio | 1 | 0.192 | 0.959 | 0.842 |
| ebi-fl187-GCST90094857 | finngen_R11_E4_OVARFAIL | Primary ovarian failure | Tea with sugar liking | Inverse variance weighted | 6 | 0.147 | 0.480 | 0.760 |
| ebi-fl187-GCST90094857 | finngen_R11_E4_OVARFAIL | Primary ovarian failure | Tea with sugar liking | MR Egger | 6 | 0.964 | 2.278 | 0.694 |
| ebi-fl187-GCST90094857 | finngen_R11_E4_OVARFAIL | Primary ovarian failure | Tea with sugar liking | Simple mode | 6 | -0.367 | 0.666 | 0.605 |
| ebi-fl187-GCST90094857 | finngen_R11_E4_OVARFAIL | Primary ovarian failure | Tea with sugar liking | Weighted mode | 6 | -0.248 | 0.642 | 0.716 |
| ebi-fl187-GCST90094857 | finngen_R11_E4_OVARFAIL | Primary ovarian failure | Tea with sugar liking | Weighted median | 6 | -0.173 | 0.561 | 0.758 |
| ebi-fl187-GCST90094859 | finngen_R11_E4_OVARFAIL | Primary ovarian failure | Tinned tuna liking | Inverse variance weighted | 3 | 0.135 | 0.656 | 0.837 |
| ebi-fl187-GCST90094859 | finngen_R11_E4_OVARFAIL | Primary ovarian failure | Tinned tuna liking | MR Egger | 3 | 5.597 | 5.032 | 0.466 |
| ebi-fl187-GCST90094859 | finngen_R11_E4_OVARFAIL | Primary ovarian failure | Tinned tuna liking | Simple mode | 3 | -0.062 | 0.985 | 0.955 |
| ebi-fl187-GCST90094859 | finngen_R11_E4_OVARFAIL | Primary ovarian failure | Tinned tuna liking | Weighted mode | 3 | 0.088 | 1.058 | 0.941 |
| ebi-fl187-GCST90094859 | finngen_R11_E4_OVARFAIL | Primary ovarian failure | Tinned tuna liking | Weighted median | 3 | 0.119 | 0.816 | 0.884 |
| ebi-fl187-GCST90094860 | finngen_R11_E4_OVARFAIL | Primary ovarian failure | Tomatoes liking | Inverse variance weighted | 4 | 1.480 | 0.834 | 0.076 |
| ebi-fl187-GCST90094860 | finngen_R11_E4_OVARFAIL | Primary ovarian failure | Tomatoes liking | MR Egger | 4 | 13.328 | 8.905 | 0.273 |
| ebi-fl187-GCST90094860 | finngen_R11_E4_OVARFAIL | Primary ovarian failure | Tomatoes liking | Simple mode | 4 | 2.418 | 1.592 | 0.226 |
| ebi-fl187-GCST90094860 | finngen_R11_E4_OVARFAIL | Primary ovarian failure | Tomatoes liking | Weighted mode | 4 | 2.439 | 1.501 | 0.203 |
| ebi-fl187-GCST90094860 | finngen_R11_E4_OVARFAIL | Primary ovarian failure | Tomatoes liking | Weighted median | 4 | 1.787 | 1.017 | 0.079 |
| ebi-fl187-GCST90094861 | finngen_R11_E4_OVARFAIL | Primary ovarian failure | Turnip liking | Inverse variance weighted (multiplicative random effects) | 3 | -0.459 | 1.364 | 0.737 |
| ebi-fl187-GCST90094861 | finngen_R11_E4_OVARFAIL | Primary ovarian failure | Turnip liking | MR Egger | 3 | 16.072 | 15.750 | 0.494 |
| ebi-fl187-GCST90094861 | finngen_R11_E4_OVARFAIL | Primary ovarian failure | Turnip liking | Simple mode | 3 | -2.027 | 1.773 | 0.371 |
| ebi-fl187-GCST90094861 | finngen_R11_E4_OVARFAIL | Primary ovarian failure | Turnip liking | Weighted mode | 3 | 1.084 | 1.049 | 0.410 |
| ebi-fl187-GCST90094861 | finngen_R11_E4_OVARFAIL | Primary ovarian failure | Turnip liking | Weighted median | 3 | -0.564 | 0.939 | 0.548 |
| ebi-fl187-GCST90094862 | finngen_R11_E4_OVARFAIL | Primary ovarian failure | Vegetables liking | Inverse variance weighted (multiplicative random effects) | 3 | 1.414 | 2.710 | 0.602 |
| ebi-fl187-GCST90094862 | finngen_R11_E4_OVARFAIL | Primary ovarian failure | Vegetables liking | MR Egger | 3 | 32.204 | 42.472 | 0.587 |
| ebi-fl187-GCST90094862 | finngen_R11_E4_OVARFAIL | Primary ovarian failure | Vegetables liking | Simple mode | 3 | 1.914 | 2.658 | 0.546 |
| ebi-fl187-GCST90094862 | finngen_R11_E4_OVARFAIL | Primary ovarian failure | Vegetables liking | Weighted mode | 3 | 0.720 | 1.699 | 0.713 |
| ebi-fl187-GCST90094862 | finngen_R11_E4_OVARFAIL | Primary ovarian failure | Vegetables liking | Weighted median | 3 | 0.968 | 1.640 | 0.555 |
| ebi-fl187-GCST90094864 | finngen_R11_E4_OVARFAIL | Primary ovarian failure | Vinegar liking | Inverse variance weighted | 11 | -0.856 | 0.514 | 0.096 |
| ebi-fl187-GCST90094864 | finngen_R11_E4_OVARFAIL | Primary ovarian failure | Vinegar liking | MR Egger | 11 | 2.557 | 2.722 | 0.372 |
| ebi-fl187-GCST90094864 | finngen_R11_E4_OVARFAIL | Primary ovarian failure | Vinegar liking | Simple mode | 11 | -0.882 | 0.718 | 0.248 |
| ebi-fl187-GCST90094864 | finngen_R11_E4_OVARFAIL | Primary ovarian failure | Vinegar liking | Weighted mode | 11 | -0.775 | 0.632 | 0.248 |
| ebi-fl187-GCST90094864 | finngen_R11_E4_OVARFAIL | Primary ovarian failure | Vinegar liking | Weighted median | 11 | -0.824 | 0.531 | 0.121 |
| ebi-fl187-GCST90094865 | finngen_R11_E4_OVARFAIL | Primary ovarian failure | White bread liking | Inverse variance weighted (multiplicative random effects) | 3 | -0.950 | 1.357 | 0.484 |
| ebi-fl187-GCST90094865 | finngen_R11_E4_OVARFAIL | Primary ovarian failure | White bread liking | MR Egger | 3 | -97.827 | 70.663 | 0.398 |
| ebi-fl187-GCST90094865 | finngen_R11_E4_OVARFAIL | Primary ovarian failure | White bread liking | Simple mode | 3 | -0.135 | 1.372 | 0.931 |
| ebi-fl187-GCST90094865 | finngen_R11_E4_OVARFAIL | Primary ovarian failure | White bread liking | Weighted mode | 3 | -0.017 | 1.308 | 0.991 |
| ebi-fl187-GCST90094865 | finngen_R11_E4_OVARFAIL | Primary ovarian failure | White bread liking | Weighted median | 3 | -0.430 | 0.999 | 0.667 |
| ebi-fl187-GCST90094867 | finngen_R11_E4_OVARFAIL | Primary ovarian failure | White wine liking | Inverse variance weighted | 5 | 1.104 | 0.558 | 0.048 |
| ebi-fl187-GCST90094867 | finngen_R11_E4_OVARFAIL | Primary ovarian failure | White wine liking | MR Egger | 5 | 0.130 | 1.431 | 0.934 |
| ebi-fl187-GCST90094867 | finngen_R11_E4_OVARFAIL | Primary ovarian failure | White wine liking | Simple mode | 5 | 0.357 | 0.958 | 0.729 |
| ebi-fl187-GCST90094867 | finngen_R11_E4_OVARFAIL | Primary ovarian failure | White wine liking | Weighted mode | 5 | 0.450 | 1.060 | 0.693 |
| ebi-fl187-GCST90094867 | finngen_R11_E4_OVARFAIL | Primary ovarian failure | White wine liking | Weighted median | 5 | 0.643 | 0.721 | 0.372 |
| ebi-fl187-GCST90094869 | finngen_R11_E4_OVARFAIL | Primary ovarian failure | Whole grain cereal liking | Wald ratio | 1 | 1.098 | 1.479 | 0.458 |
| ebi-fl187-GCST90094870 | finngen_R11_E4_OVARFAIL | Primary ovarian failure | Whole milk liking | Inverse variance weighted | 5 | -0.051 | 0.454 | 0.910 |
| ebi-fl187-GCST90094870 | finngen_R11_E4_OVARFAIL | Primary ovarian failure | Whole milk liking | MR Egger | 5 | -0.046 | 2.444 | 0.986 |
| ebi-fl187-GCST90094870 | finngen_R11_E4_OVARFAIL | Primary ovarian failure | Whole milk liking | Simple mode | 5 | -0.286 | 0.723 | 0.712 |
| ebi-fl187-GCST90094870 | finngen_R11_E4_OVARFAIL | Primary ovarian failure | Whole milk liking | Weighted mode | 5 | -0.272 | 0.721 | 0.725 |
| ebi-fl187-GCST90094870 | finngen_R11_E4_OVARFAIL | Primary ovarian failure | Whole milk liking | Weighted median | 5 | -0.236 | 0.524 | 0.653 |
| ebi-fl187-GCST90094873 | finngen_R11_E4_OVARFAIL | Primary ovarian failure | Whiskey liking | Inverse variance weighted | 5 | 0.198 | 0.474 | 0.675 |
| ebi-fl187-GCST90094873 | finngen_R11_E4_OVARFAIL | Primary ovarian failure | Whiskey liking | MR Egger | 5 | 1.099 | 10.665 | 0.924 |
| ebi-fl187-GCST90094873 | finngen_R11_E4_OVARFAIL | Primary ovarian failure | Whiskey liking | Simple mode | 5 | -0.018 | 0.745 | 0.982 |
| ebi-fl187-GCST90094873 | finngen_R11_E4_OVARFAIL | Primary ovarian failure | Whiskey liking | Weighted mode | 5 | 0.530 | 0.750 | 0.519 |
| ebi-fl187-GCST90094873 | finngen_R11_E4_OVARFAIL | Primary ovarian failure | Whiskey liking | Weighted median | 5 | 0.182 | 0.580 | 0.753 |

sweet food liking
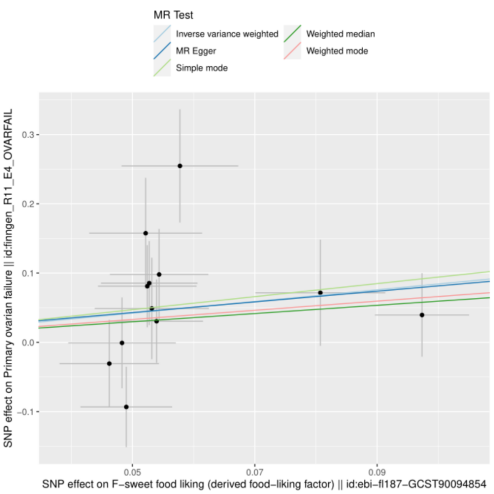

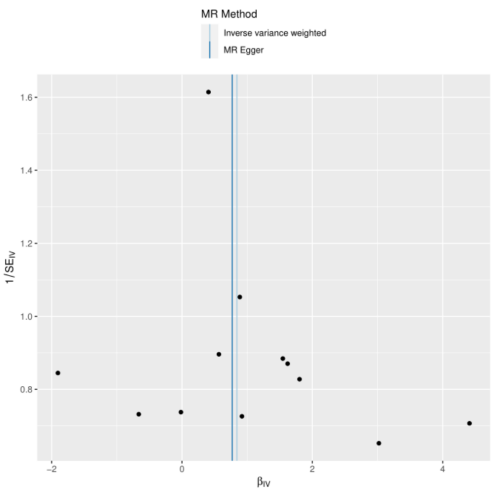

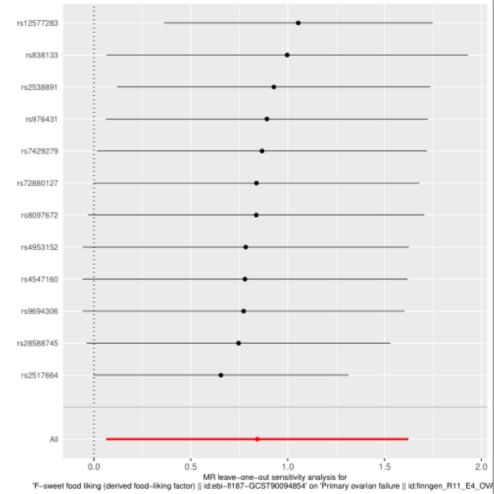


(A) (B) (C)

bitter food liking
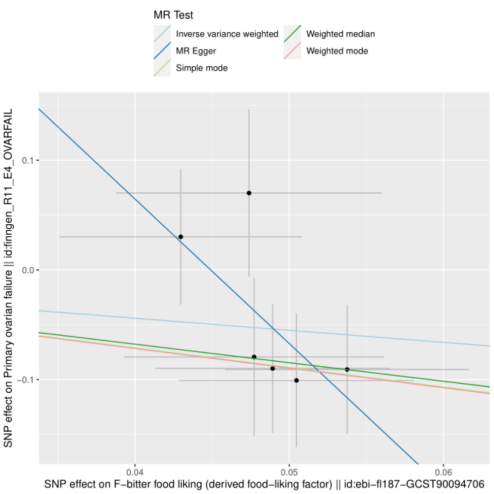

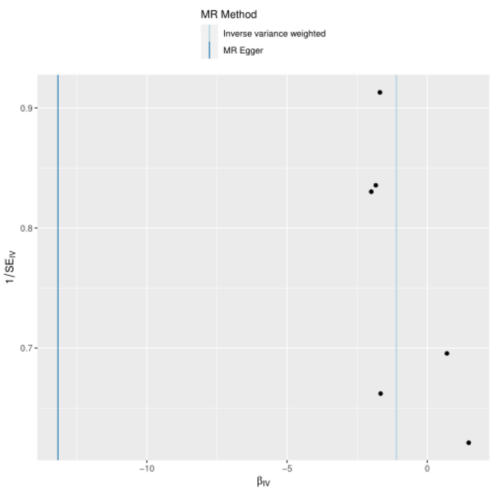

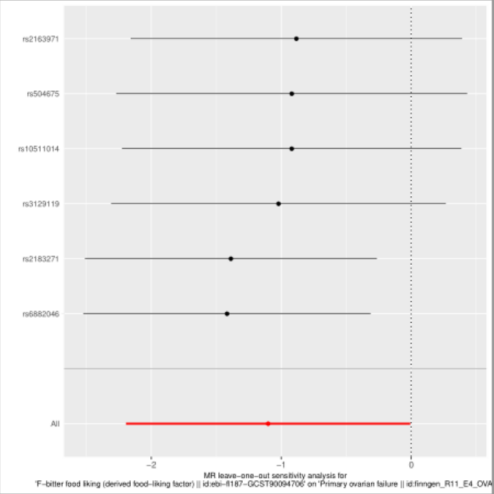


(A) (B) (C)

spicy food liking
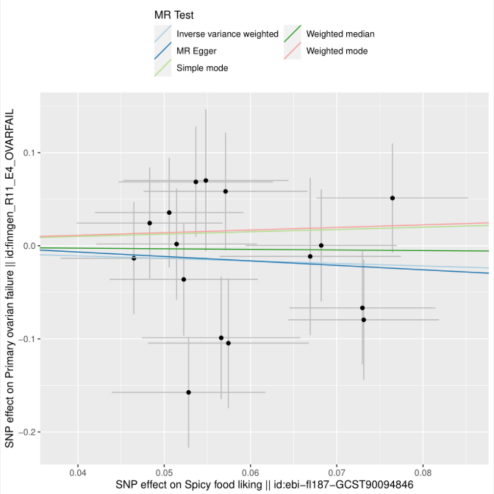

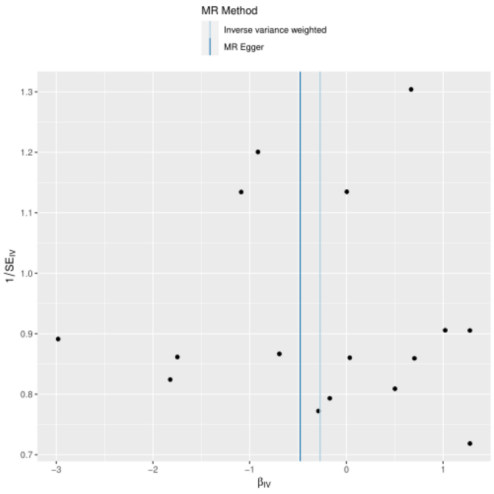

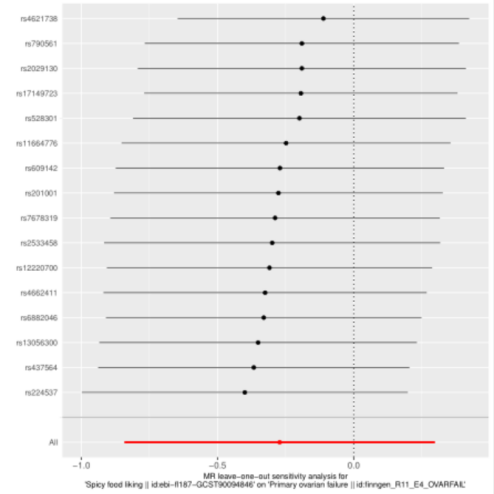


(A) (B) (C)

salty food liking
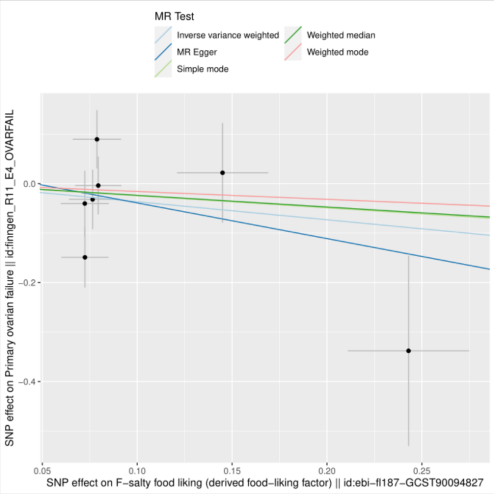

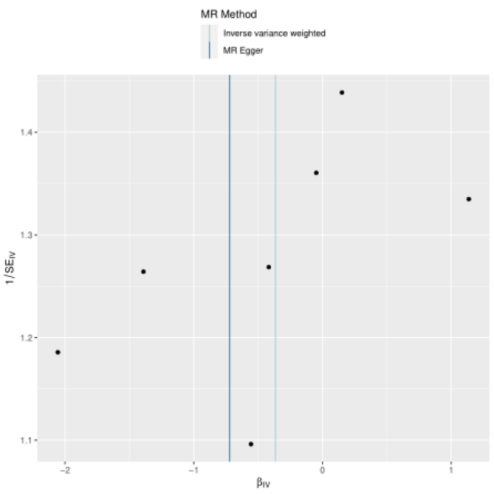

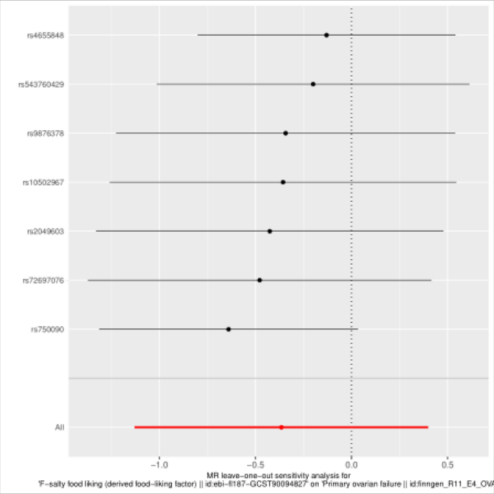


(A) (B) (C)

Mackerel liking
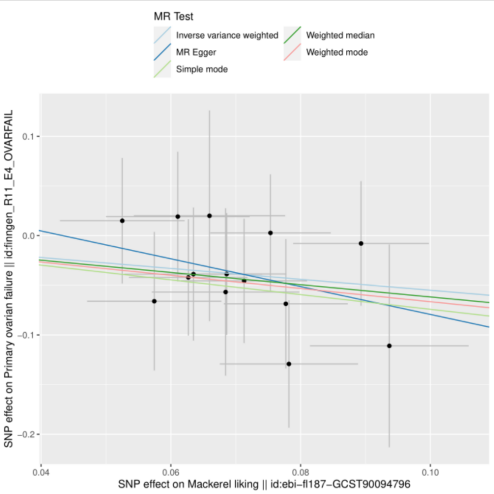

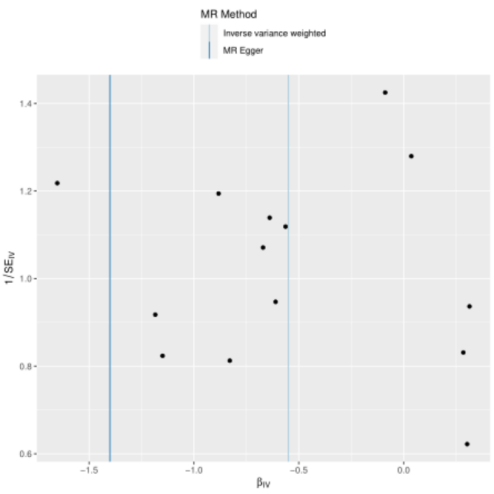

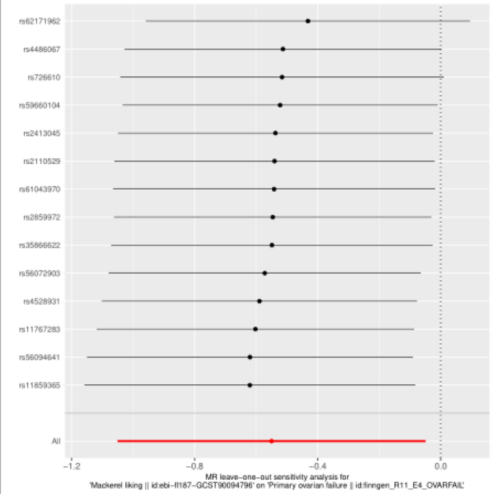


(A) (B) (C)

Gherkins liking
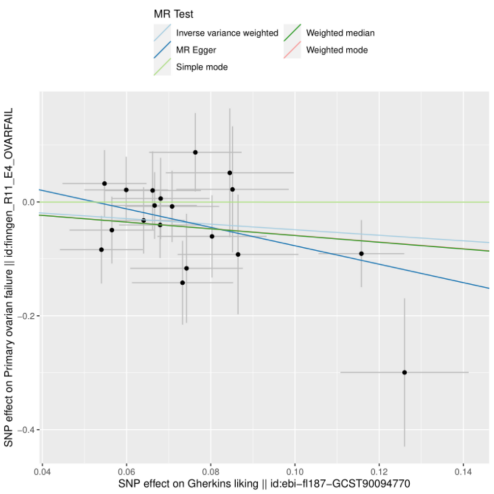

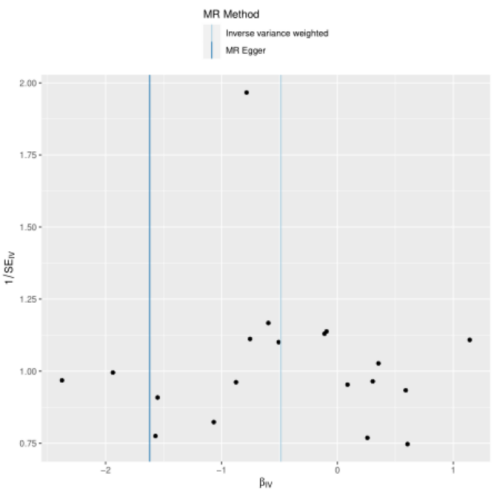

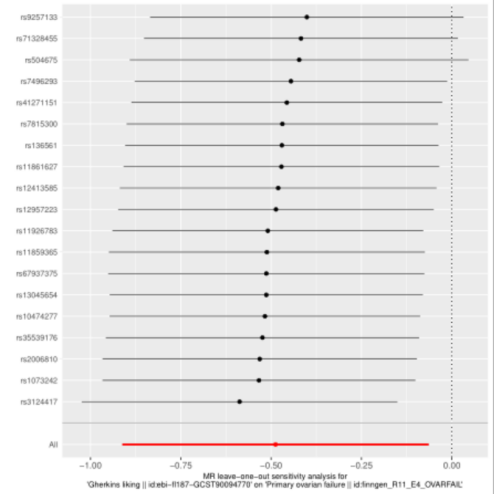


(A) (B) (C)

Cake liking
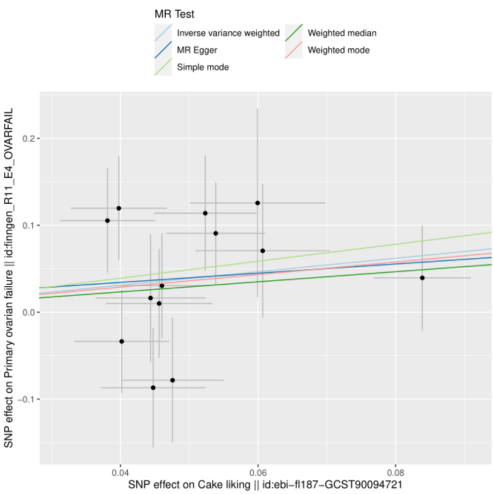

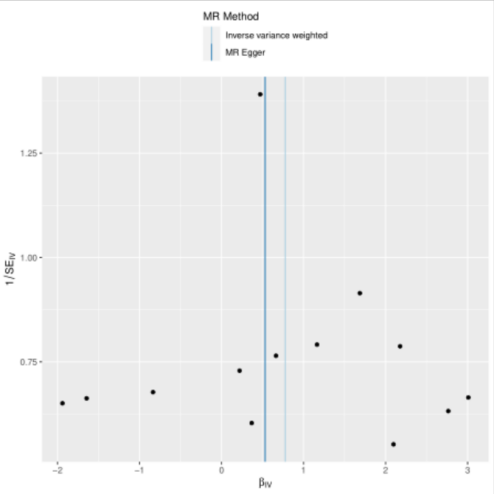

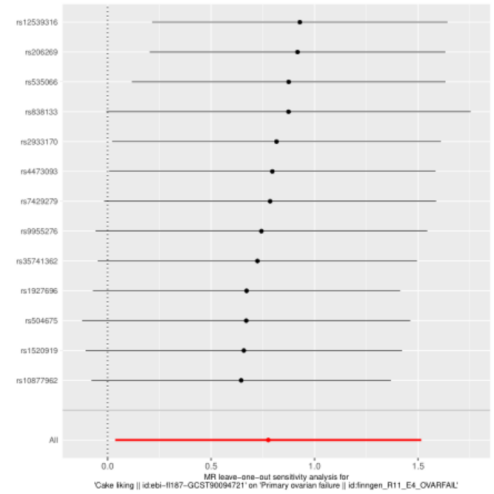


(A) (B) (C)

Cream liking
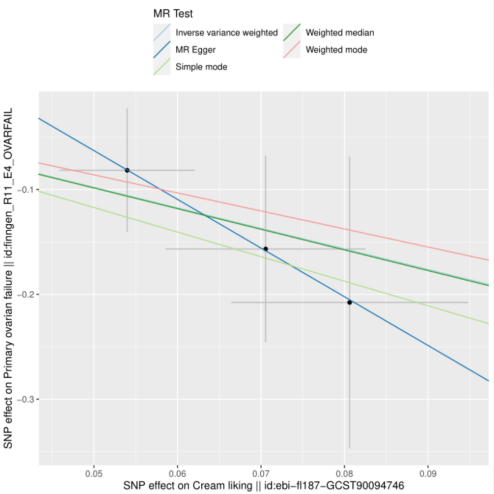

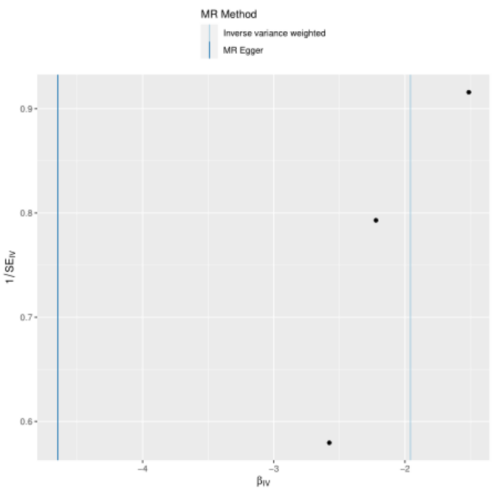

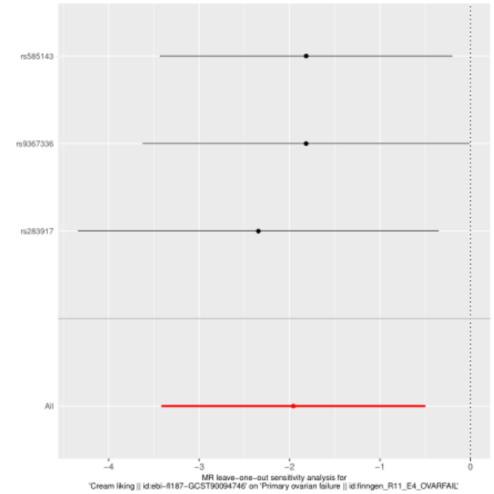


(A) (B) (C)

Soya milk liking
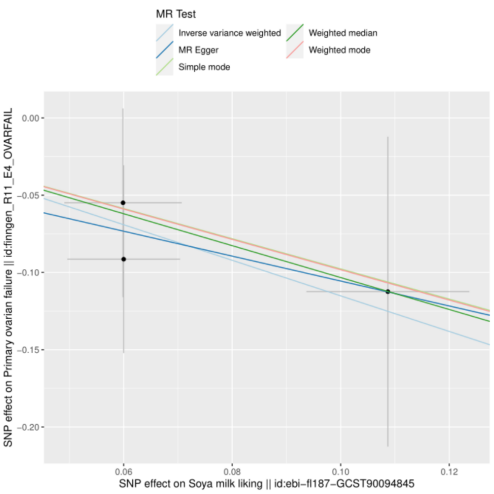

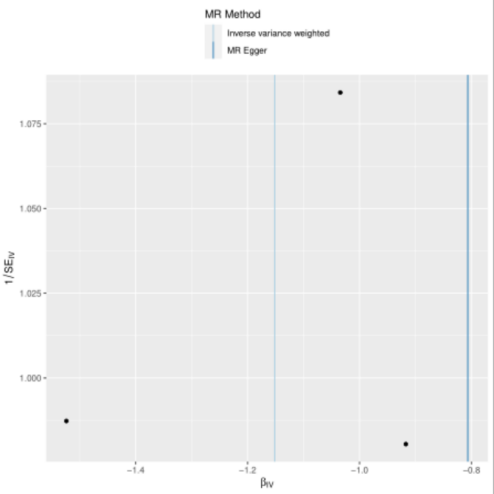

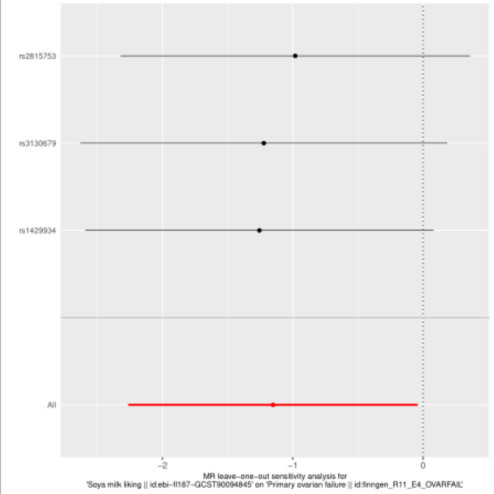


(A) (B) (C)

White wine liking
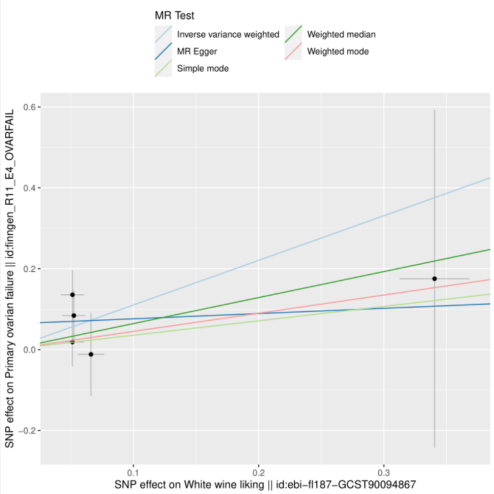

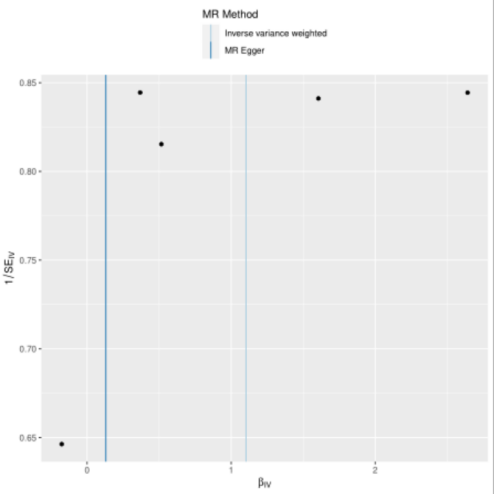

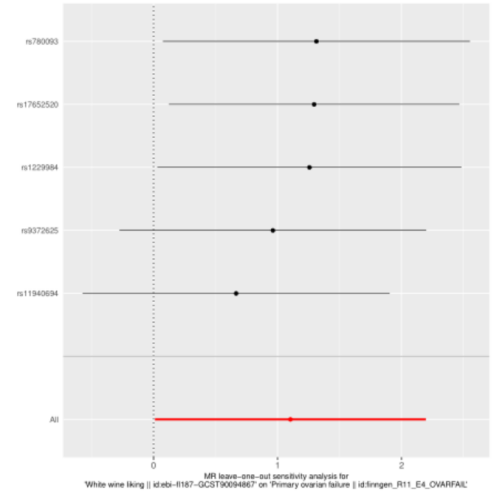


(A) (B) (C)

**Supplementary Figure S1:** Potential Causal Relationships Between Dietary Taste Preferences and POI

(A) Scatter plot (B) Funnel plot (C) Leave-one-out plots
